1 Human cytomegalovirus blocks canonical TGF $\beta$  signaling during lytic infection to limit  
2 induction of type I interferons

3

4 Andrew H. Pham<sup>1</sup>, Jennifer Mitchell<sup>1</sup>, Sara Botto<sup>1</sup>, Kara M. Pryke<sup>1</sup>, Victor R. Defilippis<sup>1</sup>  
5 and Meaghan H. Hancock<sup>1#</sup>.

6

7 <sup>1</sup>Vaccine and Gene Therapy Institute, Oregon Health and Science University, Beaverton,  
8 Oregon, USA

9

10

11 #Address correspondence to Meaghan H. Hancock, [hancocme@ohsu.edu](mailto:hancocme@ohsu.edu)

12

13

14 Running title: SMAD3 and IRF7 regulate IFN production during HCMV infection

15

16

17

18

19

20

21

22

23

## 24 **Abstract**

25 Human cytomegalovirus (HCMV) microRNAs (miRNAs) significantly rewire host signaling  
26 pathways to support the viral lifecycle and regulate host cell responses. Here we show  
27 that SMAD3 expression is regulated by HCMV miR-UL22A and contributes to the IRF7-  
28 mediated induction of type I IFNs and IFN-stimulated genes (ISGs) in human fibroblasts.  
29 Addition of exogenous TGF $\beta$  interferes with the replication of a miR-UL22A mutant virus  
30 in a SMAD3-dependent manner in wild type fibroblasts, but not in cells lacking IRF7,  
31 indicating that downregulation of SMAD3 expression to limit IFN induction is important for  
32 efficient lytic replication. These findings uncover a novel interplay between SMAD3 and  
33 innate immunity during HCMV infection and highlight the role of viral miRNAs in  
34 modulating these responses.

35

## 36 **Author Summary**

37 Cells trigger the interferon (IFN) response to induce the expression of cellular genes that  
38 limit virus replication. In turn, viruses have evolved numerous countermeasures to avoid  
39 the effects of IFN signaling. Using a microRNA (miRNA) mutant virus we have uncovered  
40 a novel means of regulating the IFN response during human cytomegalovirus (HCMV)  
41 infection. Lytic HCMV infection induces the production of TGF $\beta$ , which binds to the TGF $\beta$   
42 receptor and activates the receptor-associated SMAD SMAD3. SMAD3, together with  
43 IRF7, induces the expression of IFN $\beta$  and downstream IFN-stimulated genes in human  
44 fibroblasts. To counteract this, HCMV miR-UL22A, along with other HCMV gene products,  
45 directly targets SMAD3 for downregulation. Infection of fibroblasts with a miR-UL22A  
46 mutant virus results in enhanced type I IFN production in a SMAD3-dependent manner

47 and the virus is impaired for growth in the presence of TGF $\beta$ , but only when both SMAD3  
48 and IRF7 are present, highlighting the unique interaction between TGF $\beta$  and innate  
49 immune signaling.

50

## 51 **Introduction**

52 Human Cytomegalovirus (HCMV) has co-evolved with its host over millions of  
53 years, resulting in exquisite control of both the cellular environment and the viral lifecycle  
54 that is highly cell type-dependent. Successful viral gene expression depends on blocking  
55 the powerful innate antiviral responses induced by viral binding and entry to limit  
56 interferon (IFN) production and signaling that act to render cells less permissive to viral  
57 infection (1). To evade the innate immune response, HCMV encodes numerous gene  
58 products that block the induction of intrinsic antiviral responses and the production of IFN  
59 and IFN stimulated genes (ISGs) (reviewed in (2, 3)). Along with IFNs, viral infection  
60 results in the secretion of additional cellular and viral cytokines and chemokines, which  
61 act in an autocrine and paracrine fashion to alter the intracellular and extracellular  
62 environment (4). For example, lytically infected cells (5-7) as well as latently-infected  
63 CD34<sup>+</sup> hematopoietic progenitor cells (HPCs) (8-10), produce and secrete TGF $\beta$  which  
64 causes myelosuppression and has significant implications for hematopoietic stem cell  
65 transplantation (9).

66 TGF $\beta$  is a powerful regulator of numerous cellular pathways and has important  
67 roles in inflammation, immune modulation and cellular differentiation. The specific  
68 transcriptional outcomes of TGF $\beta$  signaling depends on cell type, TGF $\beta$  concentration  
69 and presence of additional signaling regulators resulting in either transcriptional activation

70 or repression of different subsets of cellular genes (reviewed in (11, 12)). The complex  
71 and context-dependent outcome of canonical TGF $\beta$  signaling initiates with a relatively  
72 simple signal transduction pathway. TGF $\beta$  binding results in assembly of the receptor  
73 complex consisting of TGF $\beta$  receptors I and II. Receptor-associated SMADs (R-SMADs)  
74 SMAD2 and/or SMAD3 are then recruited and phosphorylated. Phosphorylation of R-  
75 SMADs enhances their interaction with the co-SMAD SMAD4 which results in shuttling of  
76 the R-SMAD/SMAD4 complex to the nucleus. SMADs regulate transcription by altering  
77 chromatin structure and generally have only weak affinity for the SMAD binding element  
78 (CAGAC) (13-15), therefore other DNA binding proteins are required for selective binding  
79 of the SMAD complexes to target elements. In addition to the choice of DNA binding  
80 partners, the recruitment of transcriptional coactivators, such as CBP/p300 (16) or  
81 corepressors, such as TGIF (17), SKI or SnoN (18) is also critical for determining the  
82 outcome of TGF $\beta$  signaling. Thus, the transcriptional outcome of canonical TGF $\beta$   
83 signaling critically depends on the presence of a SMAD DNA binding cofactor as well as  
84 coactivators or corepressors, whose expression and localization are regulated by  
85 additional cellular signaling pathways in a context-dependent and cell type-specific  
86 manner (12).

87         Given the critical role that TGF $\beta$  plays in many cellular functions, activation and  
88 signaling by TGF $\beta$  is carefully regulated by the cell. One of the more recently studied  
89 means of regulation of the TGF $\beta$  signaling pathway is through the expression of cellular  
90 miRNAs (19). miRNAs are small, ~22 nucleotide regulatory RNAs that post-  
91 transcriptionally regulate expression of genes through binding regions of complementarity  
92 in the targeted transcript. Sequence recognition occurs through the 'seed region' of

93 miRNAs, nucleotides 2-8, and most commonly the 3' UTR of the targeted gene, although  
94 binding to other regions of the transcript can also mediate regulation (20). miRNAs are  
95 the mRNA recognition component of a larger multi-protein RNA-induced silencing  
96 complex (RISC) that recruits proteins that mediate translational repression and/or mRNA  
97 degradation to the targeted transcript (21). Cellular miRNAs regulate the TGF $\beta$  signaling  
98 pathway at every level. Ligands, receptors, R-, inhibitory (I)- and co-SMADs and non-  
99 SMAD pathway components are all targets of cellular miRNAs (19). By targeting  
100 components of the signaling pathway as well as downstream transcriptional targets,  
101 miRNAs regulate all aspects of the intricate negative and positive feedback networks of  
102 the TGF $\beta$  signaling pathway.

103 HCMV also encodes its own miRNAs (22), and we have previously demonstrated  
104 that HCMV miR-UL22A-5p and -3p block canonical TGF $\beta$  signaling in latently-infected  
105 CD34<sup>+</sup> HPCs by decreasing expression of the critical R-SMAD SMAD3 (9). Importantly,  
106 infection with a  $\Delta$ miR-UL22A mutant virus restored TGF $\beta$  signaling to levels observed in  
107 mock infected HPCs and the mutant virus was impaired for reactivation from latency due  
108 to a loss of viral genomes or viral genome-containing cells. The attenuation of canonical  
109 TGF $\beta$  signaling in CD34<sup>+</sup> HPCs as well as maintenance of the viral genomes during  
110 latency was restored by expression of a SMAD3 shRNA from the  $\Delta$ miR-UL22A genome,  
111 indicating that targeting SMAD3 and the canonical TGF $\beta$  signaling pathway is essential  
112 to maintain the viral genome in latently infected cells (9). The mechanism of TGF $\beta$ -  
113 mediated viral genome loss remains to be determined and the effect of TGF $\beta$  signaling  
114 on other stages of the HCMV lifecycle is also still unknown.

115 Here we show that canonical TGF $\beta$  signaling negatively affects lytic replication of  
116 HCMV and is counteracted by reduced SMAD3 expression mediated, in part, by miR-  
117 UL22A. We show that miR-UL22A targeting of SMAD3 is critical for viral replication in the  
118 presence of TGF $\beta$  through attenuating IRF7-mediated activation of type I IFNs and ISGs.  
119 This study uncovers a novel link between SMAD3 and IRF7 in the induction of type I IFNs,  
120 highlighting the crosstalk between TGF $\beta$  and innate immune signaling during HCMV  
121 infection.

122

## 123 **Results**

### 124 **Canonical TGF $\beta$ signaling is impaired during lytic HCMV infection**

125 Our work (9) and that of others (6-8, 23, 24) has shown that CMV-infected cells  
126 produce and secrete TGF $\beta$ . We hypothesized that HCMV protects the lytically infected  
127 cell from the effects of TGF $\beta$  signaling by manipulating components of TGF $\beta$  signaling  
128 pathway, as we have observed during latent infection in CD34<sup>+</sup> HPCs (9). To test this  
129 hypothesis, we infected normal human dermal fibroblasts (NHDF) (Fig 1A, C) and primary  
130 human aortic endothelial cells (hAEC) (Fig 1B, D) with the wild type TB40/E strain of  
131 HCMV for 48 hours followed by overnight serum starvation and 4 hour stimulation with  
132 TGF $\beta$ . In contrast to mock-infected cells, which respond to TGF $\beta$  treatment by  
133 upregulating the TGF $\beta$ -responsive transcripts JunB and SERPINE, HCMV-infected  
134 fibroblasts and endothelial cells do not show an enhancement in transcript expression  
135 following TGF $\beta$  treatment (Fig 1A, B). We next harvested protein lysates from mock- and  
136 HCMV-infected cells treated with TGF $\beta$  and analyzed expression of total and  
137 phosphorylated levels of SMAD3. Levels of both total and phosphorylated SMAD3 are

138 reduced in HCMV-infected fibroblasts (Fig 1C) and endothelial cells (Fig 1D) compared  
139 to mock-infected cells. These data indicate that lytic HCMV infection reduces the levels  
140 of SMAD3 protein which contributes to a block in canonical TGF $\beta$  signaling.

141 **Mutation of miR-UL22A partially relieves the block to canonical TGF $\beta$  signaling**  
142 **observed during HCMV infection**

143 We have previously identified SMAD3 as a target of the HCMV miRNAs miR-  
144 UL22A-5p and -3p, and have shown that miR-UL22A-mediated reduction of SMAD3 is  
145 required for genome maintenance during latent infection (9). To investigate the  
146 contribution of miR-UL22A targeting of SMAD3 to the block in canonical TGF $\beta$  signaling  
147 observed during HCMV lytic infection, we assessed SMAD3 transcript levels after  
148 infection with WT and  $\Delta$ miR-UL22A virus. As shown in Fig 2A, we observed a significant  
149 decrease in SMAD3 transcript levels upon infection with WT HCMV at 3 ( $p=0.05$ ) and 6  
150 ( $p<0.01$ ) days post-infection (dpi), suggesting that the decrease in total and  
151 phosphorylated protein (Fig. 1C) is due, at least in part, to a decrease in transcription of  
152 SMAD3. Moreover, we observed only a partial restoration in SMAD3 transcript levels after  
153  $\Delta$ miR-UL22A infection, although significantly increased ( $p=0.02$ ) compared to WT-  
154 infected cells at 6 dpi. We next treated mock, WT or  $\Delta$ miR-UL22A virus-infected  
155 fibroblasts with TGF $\beta$  and assessed phospho- and total SMAD3 protein levels (Fig 2B).  
156 Cells infected with the miR-UL22A knockout virus showed enhanced SMAD3  
157 phosphorylation and increased SMAD3 protein levels compared to WT-infected cells but  
158 did not reach the levels observed in mock-infected cells. We also assessed downstream  
159 transcriptional targets of TGF $\beta$  signaling after infection with WT or miR-UL22A knockout  
160 virus (Fig 2C). Infection with miR-UL22A knockout virus resulted in significantly increased

161 JunB (p=0.03) and SERPINE (p<0.01) transcript levels compared to WT infected cells but  
162 again infection with the  $\Delta$ miR-UL22A mutant virus did not restore transcript levels to that  
163 observed in mock-infected cells. Similar observations were made with endothelial cells  
164 (Fig 2D-E) infected with WT and miR-UL22A knockout viruses. These data indicate that  
165 miR-UL22A contributes to the blockade in TGF $\beta$  signaling observed during HCMV  
166 infection but, unlike in CD34<sup>+</sup> HPCs where mutation of miR-UL22A completely restores  
167 TGF $\beta$  signaling, other viral factors contribute to the reduction in SMAD3 transcript and  
168 protein levels during lytic infection.

169 **miR-UL22A downregulation of SMAD3 expression is important for viral replication**  
170 **in the presence of exogenous TGF $\beta$**

171 The data presented here indicate that HCMV encodes multiple mechanisms to  
172 reduce SMAD3 expression and block canonical TGF $\beta$  signaling suggesting an anti-viral  
173 role for TGF $\beta$  during lytic infection. With this in mind, we assessed the functional  
174 consequences of TGF $\beta$  signaling on viral replication using the  $\Delta$ miR-UL22A mutant virus  
175 which does not fully attenuate signaling through the canonical TGF $\beta$  signaling pathway  
176 (Fig 2). We also utilized a  $\Delta$ miR-UL22A mutant that expresses a SMAD3 shRNA in place  
177 of the miR-UL22A hairpin ( $\Delta$ miR-UL22A/SMAD3shRNA). We have previously determined  
178 that expression of a SMAD3 shRNA in place of miR-UL22A results in SMAD3 protein  
179 levels similar to WT infection (9). Additionally, we observed that expression of an shRNA  
180 from the miR-UL22A locus restores TGF $\beta$ -responsive transcript levels to those observed  
181 during WT lytic infection (Fig 3A). We next performed multi-step growth analysis in  
182 fibroblasts infected with WT,  $\Delta$ miR-UL22A and  $\Delta$ miR-UL22A/SMAD3shRNA where  
183 exogenous TGF $\beta$  was added every 3 days. As shown in Fig 3B, replication of WT virus is



184 unaffected by the addition of exogenous TGF $\beta$ . However, the miR-UL22A knockout virus,  
185 which shows an ~1 log growth defect upon low multiplicity infection, was further inhibited  
186 for growth in the presence of exogenous TGF $\beta$ . Expression of a SMAD3 shRNA in place  
187 of miR-UL22A restored growth of the mutant virus to WT levels and showed no growth  
188 defect upon TGF $\beta$  treatment. This data suggests that reducing SMAD3 protein levels and  
189 blocking the canonical TGF $\beta$  signaling pathway is important for efficient lytic viral  
190 replication.

### 191 **miR-UL22A targeting of SMAD3 regulates expression of IFN $\beta$ and interferon** 192 **stimulated genes**

193 The negative effect of exogenous TGF $\beta$  on lytic replication of the  $\Delta$ miR-UL22A virus and  
194 the restoration of mutant virus growth upon downregulation of SMAD3 implicates SMAD3  
195 protein in anti-viral responses. SMAD proteins themselves have very weak affinity for  
196 SMAD binding elements in the promoters of targeted genes, and most often interact with  
197 additional DNA binding cofactors to mediate their effects (11). One cofactor known to  
198 interact with SMAD3 is interferon regulatory factor 7 (IRF7) which, along with SMAD3,  
199 has been shown to mediate activation of the IFN $\beta$  promoter (25). Thus, we asked whether  
200 miR-UL22A, through its ability to target SMAD3, could affect the induction of IFN $\beta$  and  
201 ISGs in response to a variety of stimuli. As shown in Fig 4, transfection of miR-UL22A,  
202 SMAD3 siRNA or IRF7 siRNA significantly blocked the induction of IFN $\beta$  or the ISG  
203 RSAD2 (Viperin) in response to the cytosolic DNA stimuli ISD90 or UV-HCMV (Fig 4A,  
204 C) and RNA stimuli, including the single-stranded RNA virus Sendai virus and polyI:C (Fig  
205 4B, D). These data implicate both SMAD3 and IRF7 in IFN $\beta$  and ISG induction in

206 fibroblasts and show that miR-UL22A, likely through targeting SMAD3, also interferes  
207 with IFN $\beta$  and ISG induction.

208 We next wanted to validate that the effects of miR-UL22A and SMAD3 knockdown on IFN  
209 and ISG induction occurred through the well characterized STING and JAK/STAT  
210 mediated signaling pathways. To do this we tested the effects of miR-UL22A and SMAD3  
211 or IRF7 siRNA expression on IFN and ISG induction in previously constructed telomerized  
212 human fibroblast (tHF) cell lines deficient for STING or the type I IFN receptor IFNAR  
213 ( $\Delta$ STING and  $\Delta$ IFNAR) (26-28). STING is a key regulator in innate immune signaling  
214 downstream of cGAS recognition of incoming viral DNA including the response to HCMV  
215 infection (29, 30). In WT tHF cells, expression of miR-UL22A, SMAD3 or IRF7 siRNAs  
216 reduced IFN $\alpha$ , IFN $\beta$  and RSAD2 induction in response to ISD90, in agreement with the  
217 data presented in Fig 4 in NHDF. In the absence of STING, IFNs and RSAD2 were not  
218 induced by ISD90 stimulation and miR-UL22A and SMAD3 or IRF7 siRNAs did not further  
219 affect expression (Fig 5A-C), indicating that SMAD3, as a target of miR-UL22A, functions  
220 downstream of STING-mediated innate immune signaling. In  $\Delta$ IFNAR cells, the initial  
221 induction of IFN $\beta$  detected, but further amplification mediated by the IFNAR/JAK/STAT  
222 signaling pathway does not ensue (Fig 5D). We observed that miR-UL22A, SMAD3 and  
223 IRF7 siRNAs attenuated the (reduced) induction of IFN $\beta$  in  $\Delta$ IFNAR cells (Fig 5D),  
224 indicating that they function in the initial induction of IFN $\beta$  that occurs prior to signal  
225 amplification through the JAK/STAT pathway. IFN $\alpha$  and RSAD2 expression was  
226 abrogated in  $\Delta$ IFNAR cells and not further affected by expression of miR-U22A or SMAD3  
227 or IRF7 siRNAs (Fig 5E-F) consistent with their functions as ISGs induced by JAK/STAT  
228 signaling, in the case of RSAD2, and directly dependent on IRF7 expression, in the case

229 of IFN $\alpha$  (31-33). Thus, this data supports the hypothesis that miR-UL22A modulates  
230 SMAD3-mediated induction of IFN $\beta$  and downstream ISG induction.

231 In order to determine if the effect of miR-UL22A expression and knockdown of SMAD3  
232 on IFN and ISG induction required IRF7, we derived an IRF7 knockout tHF cell line using  
233 CRISPR/Cas9 genome editing (27, 28, 34). Endogenous IRF7 protein levels are generally  
234 undetectable in many cell types, but its expression can be induced by IFN or other innate  
235 immune stimuli (33). As shown in Fig 6A, IRF7 expression is induced by transfection of  
236 the parental tHF cells with ISD90, but IRF7 protein was undetectable in the IRF7 knockout  
237 tHF cell line. In addition, IRF7 plays a key role in the induction of IFN $\alpha$  (33, 35), which we  
238 show is not induced in the IRF7 knockout cells following ISD90 treatment (Fig 6C), further  
239 validating the  $\Delta$ IRF7 cell line. We next tested the effects of miR-UL22A and SMAD3 or  
240 IRF7 siRNA expression on IFN and ISG induction after treatment of  $\Delta$ IRF7 tHF cells with  
241 ISD90. In  $\Delta$ IRF7 cells, type I IFN and ISG induction is abrogated, and miR-UL22A or  
242 siRNAs targeting SMAD3 and IRF7 had no additional effect on gene expression  
243 consistent with the hypothesis that miR-UL22A, through targeting SMAD3, affects IRF7-  
244 mediated induction of IFN $\beta$  and downstream ISGs.

#### 245 **miR-UL22A targeting of SMAD3 limits induction of type I interferons and ISGs** 246 **during lytic infection**

247 In order to assess the role of miR-UL22A regulation of SMAD3 and IRF7-mediated  
248 signaling in the context of HCMV infection, we next tested the induction of IFN transcripts  
249 following infection with WT and  $\Delta$ miR-UL22A mutant viruses. As shown in Fig 7A and B,  
250 infection with the  $\Delta$ miR-UL22A virus resulted in increased IFN $\beta$  and IFN $\alpha$  transcript  
251 accumulation both in the absence and presence of IFN treatment compared WT- and

252  $\Delta$ miR-UL22A/SMAD3shRNA-infected cells. We also measured IFN secretion following  
253 infection with WT and miR-UL22A mutant virus (Fig 7C and D) and showed enhanced  
254 secretion of IFN $\beta$  and IFN $\alpha$  upon  $\Delta$ miR-UL22A mutant virus infection that is reduced in  
255 cells infected with  $\Delta$ miR-UL22A/SMAD3shRNA virus. We then assessed the induction of  
256 additional ISGs following infection with the  $\Delta$ miR-UL22A mutant viruses and treatment  
257 with IFN. As shown in Fig 7E and F, induction of IRF7 and RSAD2 is enhanced in cells  
258 infected with  $\Delta$ miR-UL22A mutant virus compared to WT- and  $\Delta$ miR-  
259 UL22A/SMAD3shRNA-infected cells after IFN treatment but does not reach levels  
260 observed in IFN-treated, mock-infected cells. These data indicate that miR-UL22A,  
261 through targeting SMAD3, is important for reducing type I IFN and ISG production during  
262 lytic HCMV infection but also that other gene products are likely also involved in SMAD3  
263 and IFN regulation.

#### 264 **TGF $\beta$ -mediated attenuation of lytic infection is mediated through SMAD3 and IRF7**

265 Finally, in order to determine whether the TGF $\beta$ -mediated attenuation of replication of the  
266  $\Delta$ miR-UL22A virus is due to the cross-talk between TGF $\beta$  and innate immune signaling,  
267 we analyzed the growth of WT and miR-UL22A mutant viruses in WT and  $\Delta$ STING or  
268  $\Delta$ IRF7 tHFs. Fig 8 demonstrates that while the  $\Delta$ miR-UL22A mutant virus shows reduced  
269 virus released into the supernatant upon TGF $\beta$  treatment in parental tHFs compared to  
270 WT and  $\Delta$ miR-UL22A/SMAD3shRNA viruses (Fig 8A), this defect was abrogated in cells  
271 lacking STING (Fig 8B), further supporting the role of innate immune signaling in  
272 attenuating replication of a  $\Delta$ miR-UL22A mutant virus. Moreover, the defect in  $\Delta$ miR-  
273 UL22A mutant virus growth is also abrogated in  $\Delta$ IRF7 cells, (Fig 8C) indicating that IRF7  
274 is directly involved in impeding  $\Delta$ miR-UL22A growth in response to TGF $\beta$ . Together, these

275 data support the hypothesis that SMAD3 and IRF7 cooperate to induce IFN production  
276 during HCMV infection, which has negative effects on viral replication.

277

## 278 **Discussion**

279 In this study we show that SMAD3, a TGF $\beta$  receptor-associated SMAD,  
280 cooperates with IRF7 to induce type I IFN during HCMV infection. miR-UL22A, through  
281 downregulating SMAD3 expression, plays an important role in regulating IRF7-mediated  
282 IFN production and viral replication during lytic infection. Infection with virus lacking miR-  
283 UL22A results in enhanced IFN production and release, enhanced downstream ISG  
284 induction and inhibition of growth in the presence of exogenous TGF $\beta$ . However, if the  
285  $\Delta$ miR-UL22A mutant expresses an shRNA targeting SMAD3, type I IFN and ISG induction  
286 as well as viral replication returns to WT levels, directly implicating the regulation of  
287 SMAD3 expression by miR-UL22A in modulation of IFN production and efficient viral  
288 replication.

289 Herpesviruses manipulate the intrinsic and innate IFN signaling pathways to aid in  
290 their replication cycles, which is especially important during lytic infection, where efficient  
291 viral gene expression and new virion production is paramount. In order to induce the  
292 production of IFNs after recognition of viral infection by pattern recognition receptors, the  
293 transcription factors IRF3 and IRF7 are phosphorylated by the kinase TBK1, translocate  
294 to the nucleus and, along with c-Jun, ATF2, NF $\kappa$ B and CBP/p300, bind to the *Ifnb*  
295 promoter to induce its expression (36). Autocrine IFN signaling through the IFN receptor  
296 then stimulates the production of more IRF7 and thus more type I IFN via positive  
297 feedback (35, 37), establishing IRF7 as a ‘master regulator’ of IFN production (35). In this

298 study we show that SMAD3, a TGF $\beta$  receptor-associated SMAD, cooperates with IRF7  
299 to induce type I IFNs during HCMV infection, highlighting a unique interconnection  
300 between TGF $\beta$  and IFN signaling.

301 An interaction between IRF7 and SMAD3 was first postulated due to the similarity  
302 of each transactivation domain and the fact that, upon phosphorylation, both proteins  
303 undergo structural rearrangements that promote complex formation (25). SMAD3 was also  
304 shown to interact with IRF7 (but not IRF3) at the *Irf7* promoter in mouse embryonic  
305 fibroblasts and this interaction was critical for *Irf7* transcription (25). Here we show that  
306 both IRF7 and SMAD3 are required for induction of IFN and ISG transcripts in response  
307 to a variety of PAMPs in human fibroblasts (Fig 4). The effect of miR-UL22A and SMAD3  
308 siRNA on type I IFN and ISG induction was abrogated in the absence of the signaling  
309 adaptor STING (Fig 5A-C), indicating that the SMAD3, like IRF7, functions as a  
310 component of the IFN-terminal innate immune signaling pathway. The hypothesis that  
311 SMAD3 and IRF7 work together in the initial induction of IFN $\beta$  is supported by the  
312 observations using  $\Delta$ IFNAR cells, which are capable of the initial IFN $\beta$  production  
313 following infection but cannot amplify the response. Expression of miR-UL22A and  
314 SMAD3 or IRF7 siRNA blocks the initial induction of IFN $\beta$  in  $\Delta$ IFNAR cells (Fig 5D).  
315 Furthermore, miR-UL22A and SMAD3 siRNA have no effect on the low levels of IFN $\beta$   
316 transcription in IRF7 knockout cells (Fig 6B-D), suggesting a cooperative function of  
317 SMAD3 and IRF7 in the induction of type I IFNs and downstream ISG induction in human  
318 fibroblasts.

319 The functional significance of SMAD3 targeting by miR-UL22A during lytic infection  
320 is underscored by the increased IFN $\alpha$  and IFN $\beta$  expression and secretion upon infection

321 with a  $\Delta$ miR-UL22A mutant virus (Fig 7). This enhanced type I IFN response results in  
322 increased ISG induction in the absence of miR-UL22A expression, although not to levels  
323 observed in mock-infected cells indicating that likely other SMAD3-targeting gene  
324 products are involved in this process (Fig 7 E&F). Critically, replacing the miR-UL22A  
325 hairpin locus with an shRNA targeting SMAD3 reduces type I IFN expression and  
326 secretion, along with ISG induction, to levels seen during WT infection. This indicates  
327 both the necessity and sufficiency of targeting SMAD3 for HCMV-mediated impairment  
328 of IFN. The negative effect of TGF $\beta$  on replication of the  $\Delta$ miR-UL22A mutant virus is  
329 abrogated in cell lines lacking STING or IRF7 (Fig 8), further supporting the hypothesis  
330 that SMAD3 and IRF7 function together to limit replication of HCMV through the induction  
331 of a type I IFN response.

332 Regulation of IRF7 expression and function is utilized by  $\alpha$ - and  $\gamma$ -herpesviruses  
333 as a means to dampen the IFN response during infection. Kaposi's Sarcoma-associated  
334 Herpesvirus (KSHV) and Herpes Simplex virus (HSV) encode proteins that sequester or  
335 degrade IRF7 (38-45). In contrast, during Epstein Barr virus (EBV) latent infection, IRF7  
336 expression is stimulated by latent membrane protein-1 (LMP-1) (46-49) which in turn  
337 regulates expression of the EBNA1 Q promoter (50) and LMP-1 itself. However, during  
338 reactivation, EBV IE proteins BZLF1 (51) and LF2 (52) bind and repress IRF7 activity and  
339 BRLF1 downregulates IRF7 expression and IFN $\beta$  production (53). Thus, along with the  
340 data presented here for HCMV, it is clear that targeting IRF7 expression and/or function  
341 during lytic infection is a common theme amongst the herpesvirus family.

342 The role of TGF $\beta$  signaling in herpesvirus infection is highly relevant yet complex,  
343 with differing effects on lytic and latency stages of the lifecycle. TGF $\beta$  treatment of EBV

344 latently infected cells can induce reactivation via SMAD binding to the *BZLF1* promoter  
345 (54). Thus, EBV encodes factors that directly or indirectly interfere with components of  
346 the TGF $\beta$  signaling pathway (55-57). Additionally, EBV proteins upregulate the cellular  
347 miRNA miR-146a which directly targets SMAD4 (58, 59). Likewise, KSHV proteins induce  
348 the expression of the cellular miR-17-92 family, which targets SMAD2 (60). KSHV also  
349 encodes proteins (61-63) and miRNAs (64, 65) that target components of the TGF $\beta$   
350 signaling pathway. In contrast, infection of human mononuclear cells with HSV-1 induces  
351 TGF $\beta$  production (66) and use of conditional TGF $\beta$  knockout mouse models suggests that  
352 TGF $\beta$  signaling, while dampening the innate immune response, enhances HSV-1 latency  
353 (67).

354         Similar to HSV-1, the HCMV major immediate early proteins can activate the TGF $\beta$   
355 promoter, which occurs indirectly through IE2 transactivation of the cellular immediate  
356 early transcription factor EGR-1, but was also shown to require additional viral factors  
357 during infection (6, 7). Recent studies implicate miR-US5-2 targeting of the transcription  
358 repressor NAB1 as one of the possible additional mechanisms (9). Furthermore, HCMV  
359 IE1 and IE2 induce the expression of MMP-2 in renal tubular epithelial cells, which may  
360 result in enhanced activation of latent TGF $\beta$  in the extracellular matrix of HCMV-infected  
361 cells and contribute to the fibrosis observed during transplantation (68). Thus, CMV  
362 infection induces the production of TGF $\beta$  by multiple mechanisms but encodes multiple  
363 factors to block the canonical TGF $\beta$  signaling pathway (Figs 1-3).

364         While removal of the pre-miR-UL22A sequence from the viral genome results in  
365 enhanced SMAD3 protein levels and expression of classical downstream TGF $\beta$   
366 transcriptional targets during lytic infection, responses do not return to levels observed in



367 mock-infected cells (Fig 2B-E, 7E&F), suggesting that the virus uses additional  
368 mechanisms (utilizing viral proteins and/or additional miRNAs or long non-coding RNAs)  
369 to alter SMAD3 mRNA and protein levels and inhibit the TGF $\beta$  signaling pathway.  
370 Possible additional mechanisms utilized by HCMV to to manipulate the TGF $\beta$  signaling  
371 pathway remain to be identified, but could include inhibiting SMAD3 transcription  
372 initiation, affecting the expression or stability of additional members of the signaling  
373 pathway or induction of negative pathway regulators, such as the I-SMADs. Interestingly,  
374 HCMV blocks the signaling pathway of the related TGF $\beta$  family member activin by directly  
375 targeting the activin receptor (ACVR1B) using miR-UL148D to prevent the production and  
376 release of IL6 in monocytes (69).

377         The interplay between type I IFN and TGF $\beta$  signaling during HCMV infection  
378 highlights the complex interconnection of signaling pathways that are regulated by viral  
379 proteins and non-coding RNAs. An inability to downregulate SMAD3 during latent  
380 infection results in a loss of viral genomes from the infected cells (9) and whether this  
381 phenotype is due to enhanced IFN signaling remains to be determined. Future studies  
382 will explore how this novel interplay between the TGF $\beta$  and IFN signaling pathways is  
383 important for HCMV latency in hematopoietic progenitor cells.

384

## 385 **Materials and Methods**

386 **Cell lines:** Normal human dermal fibroblasts (NHDF), human foreskin fibroblasts (stably  
387 transduced with constitutively expressed human telomerase reverse transcriptase and  
388 the IRF/IFN-responsive pGreenFire-ISRE lentivector; tHF) (27) and the tHF  $\Delta$ STING (26),  
389  $\Delta$ IFNAR (28) and  $\Delta$ IRF7 cell lines were cultured in Dulbecco's modified Eagle's medium

390 (DMEM) supplemented with 5% heat-inactivated fetal bovine serum (FBS; HyClone), 100  
391 units/ml penicillin, and 100ug/ml streptomycin (ThermoFisher). Human aortic endothelial  
392 cells (AEC) (CC-2535; Lonza) were cultured in EBM-2 basal medium with EGM-2  
393 SingleQuots™ supplement excluding Heparin (Lonza), as well as 10% FBS, penicillin,  
394 and streptomycin. All cells were maintained at 37°C and 5% CO<sub>2</sub>. Recombinant human  
395 TGFβ and Universal Type I IFN was obtained from R&D Systems.

### 396 **HCMV Constructs and infections**

397 HCMV used in this study include BAC-generated WT TB40/E expressing GFP from the  
398 SV40 promoter (70), a TB40/E mutant virus lacking the pre-miR-UL22A sequence or a  
399 TB40/E mutant virus with the pre-miR-UL22A sequence replaced by a SMAD3 shRNA  
400 generated by galk-mediated recombination (9). All virus stocks were propagated and  
401 titered on NHDFs. Fibroblasts were infected with HCMV at three plaque-forming units  
402 (PFU)/cell and hAEC were infected with HCMV at five PFU/cell for 2 hours at 37°C.  
403 After this time, the inoculum was removed and replaced with fresh medium and samples  
404 were harvested as appropriate for each experiment. For experiments involving TGFβ  
405 stimulation, cells were infected as above for 48 hours followed by serum starvation  
406 overnight. The next day cells were treated with 100pg/mL TGFβ for 4 hours. Multi-step  
407 growth curves were performed in duplicate using NHDF, tHF or derivatives infected with  
408 0.01 PFU/cell in DMEM containing 1% FBS and recombinant TGFβ (100pg/mL) was  
409 added immediately after infection and every 3 days thereafter. UV inactivation of HCMV  
410 was performed using the Spectrolinker XL-1000 (Spectronics Corporation) by exposing  
411 virus resuspended in 200 μl for 30 s at 600 μJ three times sequentially (71). Sendai

412 virus (SeV) was obtained from Charles River Laboratories and used at 160  
413 hemagglutination units (HAU)/mL.

414 **Transfections:** NHDF or tHF cells seeded in 12 well plates were transfected with 40uM  
415 siRNAs (SMAD3 and IRF7; ThermoFisherScientific) or miRNA mimics (custom  
416 designed; IDT) per well using Lipofectamine RNAiMax (ThermoFisherScientific)  
417 according to the manufacturer's instructions. 33ug/mL ISD90 (IDT) and 16.5ug/mL  
418 polyI:C (Invivogen) was transfected into cells using Lipofectamine 3000 according to the  
419 manufacturer's instructions.

420 **qRT-PCR:** Total RNA was isolated from transfected or infected cells using the Trizol RNA  
421 isolation method. cDNA was prepared using 1000ng of total RNA and random hexamer  
422 primers. Samples were incubated at 16°C for 30 minutes, 42°C for 30 minutes and 85°C  
423 for 5 minutes. Real-time PCR (Taqman) was used to analyze cDNA levels in transfected  
424 or infected samples. An ABI StepOnePlus Real Time PCR machine was used with the  
425 following program for 40 cycles: 95°C for 15 sec and 60°C for one minute. Relative  
426 expression was determined using the  $\Delta\Delta C_t$  method using 18S as the standard control.  
427 JunB, SERPINE, SMAD3, TGFB1, IFNA1, IFNB1, RSAD2, IRF7 and 18S primer/probe  
428 sets were obtained from ThermoFisher Scientific.

429 **Immunoblotting:** Protein extracts were run on an 8% SDS-PAGE, transferred to  
430 Immobilon-P Transfer Membranes (Millipore Corp., Bedford, MA), and visualized with  
431 specific antibodies: phosho-SMAD3 (Abcam), total SMAD3 (Abcam), IE86 (mAb 810;  
432 Millipore), IRF7 (Santa Cruz) and GAPDH (Abcam). Relative intensity of bands detected  
433 by western blotting was quantitated using ImageJ software.

434 **ELISAs:** Supernatants harvested from infected cells were centrifuged at maximum  
435 speed for 30sec to remove cell debris and stored at  $-80^{\circ}\text{C}$  prior to cytokine  
436 measurements.  $\text{IFN}\alpha$  was quantified using the pan- $\text{IFN}\alpha$  ELISA kit (Stem Cell  
437 Technologies).  $\text{IFN}\beta$  was quantified using human  $\text{IFN}$ -beta Quantikine ELISA kit (R&D  
438 Systems). All measurements were made following the manufacturers' protocols.

439 **Construction of IRF7 KO fibroblasts:** Genome editing using lentivirus-mediated  
440 delivery of CRISPR-Cas9 components was performed generally as described previously  
441 (27, 28, 34). Briefly, a 20 nucleotide guide RNA (gRNA) sequence targeting the IRF7  
442 protein-coding region was inserted into the lentiCRISPRv2 vector (Addgene; catalog  
443 #52961). The IRF7 guide sequences used was: TACACCTTGTGCGGGTCGGC. tHF  
444 cells stably transduced with the  $\text{IFN}$ -responsive pGreenFire-ISRE lentivector (System  
445 Biosciences) were further stably transduced with the lentiCRISPRv2 vector, selected  
446 using puromycin at  $3\mu\text{g}/\text{mL}$ , and IRF7 knockdown was confirmed by western blotting.

447 **Statistical Analysis:** The Student's two tailed t test (Microsoft Excel software) was used  
448 to determine p values. Results were considered significant at a probability ( $p$ )  $< 0.05$ .

449

## 450 **Acknowledgments**

451 The authors would like to acknowledge members of the Nelson and Defilippis labs for  
452 helpful discussions.

453

## 454 **Figure Legends**

455 **Fig 1. HCMV infection blocks canonical  $\text{TGF}\beta$  signaling.** NHDF (A) of hAEC (B) were  
456 infected with WT TB40E for 48 hours, followed by overnight serum starvation and

457 stimulation with recombinant TGF $\beta$  (100pg/mL) for 4 hours. RNA was isolated and  
458 subjected to qRT-PCR for JunB and SERPINE. Experiments were performed in triplicate.  
459 \*  $p < 0.05$  by two tailed Student's t test. NHDF (C) or hAEC (D) were infected as above  
460 and protein lysates subjected to immunoblotting using the indicated antibodies.

461

462 **Fig 2. miR-UL22A targets SMAD3 during lytic infection.** (A) NHDF were infected for 3  
463 or 6 days with the indicated virus and then RNA was isolated and subjected to qRT-PCR  
464 for SMAD3. Experiments were performed in triplicate. NHDF (B) or hAEC (D) were  
465 infected with the indicated viruses for 48 hours followed by overnight serum starvation  
466 and stimulation with TGF $\beta$  (100pg/mL) for 4 hours. Protein lysates were subjected to  
467 immunoblotting using the indicated antibodies. NHDF (C) or hAEC (E) were infected as  
468 in (B) and RNA was isolated followed by qRT-PCR for JunB or SERPINE. Experiments  
469 were performed in triplicate. \*  $p < 0.05$  by two tailed Student's t test.

470

471 **Fig 3. Targeting SMAD3 for downregulation is necessary for efficient lytic**  
472 **replication.** (A) NHDF were infected with the indicated viruses for 48 hours followed by  
473 overnight serum starvation and stimulation with recombinant TGF $\beta$  (100pg/mL) for 4  
474 hours. RNA was isolated and subjected to qRT-PCR for JunB and SERPINE.  
475 Experiments were performed in triplicate. \*  $p < 0.05$  by two tailed Student's t test. (B) NHDF  
476 were infected at 0.01 PFU/mL for 2 hours. 100pg/mL TGF $\beta$  was added immediately after  
477 infection and every 3 days throughout the experiment. Samples were harvested at the  
478 indicated timepoints and titered on NHDF. Experiment was performed in duplicate.

479

480 **Fig 4. miR-UL22A and SMAD3 siRNA affect IFN and ISG induction in response to**  
481 **multiple stimuli.** (A-D) NHDF were transfected with negative control, miR-UL22A mimic  
482 or SMAD3 or IRF7 siRNA. 24 hours post-transfection cells were either: (A, C) infected  
483 with UV-inactivated HCMV or transfected with ISD90 for a further 24 hours or (B, D)  
484 infected with Sendai virus or transfected with polyI:C for a further 24 hours. After this time,  
485 RNA was isolated and qRT-PCR was performed for IFN $\beta$  or RSAD2. All experiments were  
486 performed in triplicate. \*  $p < 0.05$  by two tailed Student's t test.

487  
488 **Fig 5. SMAD3 participates in STING- and IFN receptor-mediated signaling.** tHF,  
489  $\Delta$ STING (A-C) or  $\Delta$ IFNAR (D-F) tHFs were transfected with negative control, miR-UL22A  
490 mimic or SMAD3 or IRF7 siRNA for 48 hours after which cells were additionally mock  
491 transfected or transfected with ISD90 for 16 hours. RNA was isolated and subjected to  
492 qRT-PCR for IFN $\beta$ , IFN $\alpha$ 1 or RSAD2. All experiments were performed in triplicate. \*  
493  $p < 0.05$  by two tailed Student's t test.

494  
495 **Fig 6. SMAD3 participates in IRF7-mediated signaling.** (A) tHF or  $\Delta$ IRF7 tHFs were  
496 transfected with ISD90 for 16 hours. Protein lysates were subjected to immunoblotting for  
497 IRF7 or GAPDH. (B-D) tHF or  $\Delta$ IRF7 tHFs were transfected with negative control, miR-  
498 UL22A mimic or SMAD3 or IRF7 siRNA for 48 hours after which cells were additionally  
499 mock transfected or transfected with ISD90 for 16 hours. RNA was isolated and subjected  
500 to qRT-PCR for IFN $\beta$ , IFN $\alpha$ 1 or RSAD2. All experiments were performed in triplicate. \*  
501  $p < 0.05$  by two tailed Student's t test.

502

503 **Fig 7. miR-UL22A targeting of SMAD3 regulates IFN and ISG induction.** (A-B) NHDFs  
504 were infected with the indicated viruses for 48 hours followed by treatment with uIFN  
505 (1000U/mL) for 16 hours. RNA was isolated and subjected to qRT-PCR for IFN $\beta$  and  
506 IFN $\alpha$ 1. (C-D) NHDFs were infected as in (A) and supernatants were harvested after 72  
507 hours. ELISAs were performed for (C) IFN $\beta$  and (D) pan-IFN $\alpha$ . (E-F) NHDF were infected  
508 as in (A) and treated with IFN after 24 hours of infection. RNA was isolated 48 hours post-  
509 infection and subjected to qRT-PCR for IRF7 and RSAD2. All experiments were  
510 performed in triplicate. \*  $p < 0.05$  by two tailed Student's t test.

511

512 **Fig 8. TGF $\beta$  impairs lytic replication in coordination with IRF7.** tHF (A),  $\Delta$ STING (B)  
513 or  $\Delta$ IRF7 (C) tHFs were infected at 0.01 PFU/mL. TGF $\beta$  was added (100pg/mL) after  
514 initial infection and again at days 6 and 9. Supernatants were harvested and titered in  
515 NHDF. Experiments were performed in duplicate.

516

517

## 518 **References**

- 519 1. Ashley CL, Abendroth A, McSharry BP, Slobedman B. Interferon-Independent Innate  
520 Responses to Cytomegalovirus. *Front Immunol.* 2019;10:2751.
- 521 2. Goodwin CM, Ciesla JH, Munger J. Who's Driving? Human Cytomegalovirus, Interferon,  
522 and NFkappaB Signaling. *Viruses.* 2018;10(9).
- 523 3. Amsler L, Verweij M, DeFilippis VR. The tiers and dimensions of evasion of the type I  
524 interferon response by human cytomegalovirus. *J Mol Biol.* 2013;425(24):4857-71.
- 525 4. Chinta P, Garcia EC, Tajuddin KH, Akhidenor N, Davis A, Faure L, et al. Control of Cytokines  
526 in Latent Cytomegalovirus Infection. *Pathogens.* 2020;9(10).
- 527 5. Kwon YJ, Kim DJ, Kim JH, Park CG, Cha CY, Hwang ES. Human cytomegalovirus (HCMV)  
528 infection in osteosarcoma cell line suppresses GM-CSF production by induction of TGF-beta.  
529 *Microbiol Immunol.* 2004;48(3):195-9.



- 530 6. Yoo YD, Chiou CJ, Choi KS, Yi Y, Michelson S, Kim S, et al. The IE2 regulatory protein of  
531 human cytomegalovirus induces expression of the human transforming growth factor beta1 gene  
532 through an Egr-1 binding site. *J Virol.* 1996;70(10):7062-70.
- 533 7. Michelson S, Alcamì J, Kim SJ, Danielpour D, Bachelier F, Picard L, et al. Human  
534 cytomegalovirus infection induces transcription and secretion of transforming growth factor beta  
535 1. *J Virol.* 1994;68(9):5730-7.
- 536 8. Mason GM, Poole E, Sissons JG, Wills MR, Sinclair JH. Human cytomegalovirus latency  
537 alters the cellular secretome, inducing cluster of differentiation (CD)4+ T-cell migration and  
538 suppression of effector function. *Proc Natl Acad Sci U S A.* 2012;109(36):14538-43.
- 539 9. Hancock MH, Crawford LB, Pham AH, Mitchell J, Struthers HM, Yurochko AD, et al. Human  
540 Cytomegalovirus miRNAs Regulate TGF-beta to Mediate Myelosuppression while Maintaining  
541 Viral Latency in CD34(+) Hematopoietic Progenitor Cells. *Cell Host Microbe.* 2020;27(1):104-14  
542 e4.
- 543 10. Kim JH, Collins-McMillen D, Buehler JC, Goodrum FD, Yurochko AD. Human  
544 Cytomegalovirus Requires Epidermal Growth Factor Receptor Signaling To Enter and Initiate the  
545 Early Steps in the Establishment of Latency in CD34(+) Human Progenitor Cells. *J Virol.* 2017;91(5).
- 546 11. Battle E, Massague J. Transforming Growth Factor-beta Signaling in Immunity and Cancer.  
547 *Immunity.* 2019;50(4):924-40.
- 548 12. David CJ, Massague J. Contextual determinants of TGFbeta action in development,  
549 immunity and cancer. *Nat Rev Mol Cell Biol.* 2018;19(7):419-35.
- 550 13. Shi Y, Wang YF, Jayaraman L, Yang H, Massague J, Pavletich NP. Crystal structure of a Smad  
551 MH1 domain bound to DNA: insights on DNA binding in TGF-beta signaling. *Cell.* 1998;94(5):585-  
552 94.
- 553 14. BabuRajendran N, Palasingam P, Narasimhan K, Sun W, Prabhakar S, Jauch R, et al.  
554 Structure of Smad1 MH1/DNA complex reveals distinctive rearrangements of BMP and TGF-beta  
555 effectors. *Nucleic Acids Res.* 2010;38(10):3477-88.
- 556 15. Martin-Malpartida P, Batet M, Kaczmarek Z, Freier R, Gomes T, Aragon E, et al. Structural  
557 basis for genome wide recognition of 5-bp GC motifs by SMAD transcription factors. *Nature*  
558 *communications.* 2017;8(1):2070.
- 559 16. Feng XH, Zhang Y, Wu RY, Derynck R. The tumor suppressor Smad4/DPC4 and  
560 transcriptional adaptor CBP/p300 are coactivators for smad3 in TGF-beta-induced transcriptional  
561 activation. *Genes Dev.* 1998;12(14):2153-63.
- 562 17. Wotton D, Lo RS, Lee S, Massague J. A Smad transcriptional corepressor. *Cell.*  
563 1999;97(1):29-39.
- 564 18. Luo K. Ski and SnoN: negative regulators of TGF-beta signaling. *Curr Opin Genet Dev.*  
565 2004;14(1):65-70.
- 566 19. Suzuki HI. MicroRNA Control of TGF-beta Signaling. *International journal of molecular*  
567 *sciences.* 2018;19(7).
- 568 20. Grey F, Tirabassi R, Meyers H, Wu G, McWeeney S, Hook L, et al. A viral microRNA down-  
569 regulates multiple cell cycle genes through mRNA 5'UTRs. *PLoS Pathog.* 2010;6(6):e1000967.
- 570 21. Bartel DP. Metazoan MicroRNAs. *Cell.* 2018;173(1):20-51.
- 571 22. Stark TJ, Arnold JD, Spector DH, Yeo GW. High-resolution profiling and analysis of viral and  
572 host small RNAs during human cytomegalovirus infection. *J Virol.* 2012;86(1):226-35.



- 573 23. Haagmans BL, Teerds KJ, van den Eijnden-van Raaij AJ, Horzinek MC, Schijns VE.  
574 Transforming growth factor beta production during rat cytomegalovirus infection. *J Gen Virol.*  
575 1997;78 ( Pt 1):205-13.
- 576 24. Helantera I, Loginov R, Koskinen P, Tornroth T, Gronhagen-Riska C, Lautenschlager I.  
577 Persistent cytomegalovirus infection is associated with increased expression of TGF-beta1, PDGF-  
578 AA and ICAM-1 and arterial intimal thickening in kidney allografts. *Nephrol Dial Transplant.*  
579 2005;20(4):790-6.
- 580 25. Qing J, Liu C, Choy L, Wu RY, Pagano JS, Derynck R. Transforming growth factor  
581 beta/Smad3 signaling regulates IRF-7 function and transcriptional activation of the beta  
582 interferon promoter. *Mol Cell Biol.* 2004;24(3):1411-25.
- 583 26. Abraham J, Botto S, Mizuno N, Pryke K, Gall B, Boehm D, et al. Characterization of a Novel  
584 Compound That Stimulates STING-Mediated Innate Immune Activity in an Allele-Specific Manner.  
585 *Front Immunol.* 2020;11:1430.
- 586 27. Pryke KM, Abraham J, Sali TM, Gall BJ, Archer I, Liu A, et al. A Novel Agonist of the TRIF  
587 Pathway Induces a Cellular State Refractory to Replication of Zika, Chikungunya, and Dengue  
588 Viruses. *mBio.* 2017;8(3).
- 589 28. Gall B, Pryke K, Abraham J, Mizuno N, Botto S, Sali TM, et al. Emerging Alphaviruses Are  
590 Sensitive to Cellular States Induced by a Novel Small-Molecule Agonist of the STING Pathway. *J*  
591 *Virol.* 2018;92(6).
- 592 29. Paijo J, Doring M, Spanier J, Grabski E, Nooruzzaman M, Schmidt T, et al. cGAS Senses  
593 Human Cytomegalovirus and Induces Type I Interferon Responses in Human Monocyte-Derived  
594 Cells. *PLoS Pathog.* 2016;12(4):e1005546.
- 595 30. Lio CW, McDonald B, Takahashi M, Dhanwani R, Sharma N, Huang J, et al. cGAS-STING  
596 Signaling Regulates Initial Innate Control of Cytomegalovirus Infection. *J Virol.* 2016;90(17):7789-  
597 97.
- 598 31. Sato M, Hata N, Asagiri M, Nakaya T, Taniguchi T, Tanaka N. Positive feedback regulation  
599 of type I IFN genes by the IFN-inducible transcription factor IRF-7. *FEBS Lett.* 1998;441(1):106-10.
- 600 32. Sato M, Suemori H, Hata N, Asagiri M, Ogasawara K, Nakao K, et al. Distinct and essential  
601 roles of transcription factors IRF-3 and IRF-7 in response to viruses for IFN-alpha/beta gene  
602 induction. *Immunity.* 2000;13(4):539-48.
- 603 33. Marie I, Durbin JE, Levy DE. Differential viral induction of distinct interferon-alpha genes  
604 by positive feedback through interferon regulatory factor-7. *EMBO J.* 1998;17(22):6660-9.
- 605 34. Sali TM, Pryke KM, Abraham J, Liu A, Archer I, Broeckel R, et al. Characterization of a Novel  
606 Human-Specific STING Agonist that Elicits Antiviral Activity Against Emerging Alphaviruses. *PLoS*  
607 *Pathog.* 2015;11(12):e1005324.
- 608 35. Honda K, Yanai H, Negishi H, Asagiri M, Sato M, Mizutani T, et al. IRF-7 is the master  
609 regulator of type-I interferon-dependent immune responses. *Nature.* 2005;434(7034):772-7.
- 610 36. Fitzgerald KA, McWhirter SM, Faia KL, Rowe DC, Latz E, Golenbock DT, et al. IKKepsilon  
611 and TBK1 are essential components of the IRF3 signaling pathway. *Nat Immunol.* 2003;4(5):491-  
612 6.
- 613 37. Au WC, Moore PA, LaFleur DW, Tombal B, Pitha PM. Characterization of the interferon  
614 regulatory factor-7 and its potential role in the transcription activation of interferon A genes. *J*  
615 *Biol Chem.* 1998;273(44):29210-7.

- 616 38. Yu Y, Wang SE, Hayward GS. The KSHV immediate-early transcription factor RTA encodes  
617 ubiquitin E3 ligase activity that targets IRF7 for proteasome-mediated degradation. *Immunity*.  
618 2005;22(1):59-70.
- 619 39. Zhu FX, King SM, Smith EJ, Levy DE, Yuan Y. A Kaposi's sarcoma-associated herpesviral  
620 protein inhibits virus-mediated induction of type I interferon by blocking IRF-7 phosphorylation  
621 and nuclear accumulation. *Proc Natl Acad Sci U S A*. 2002;99(8):5573-8.
- 622 40. Zhu FX, Sathish N, Yuan Y. Antagonism of host antiviral responses by Kaposi's sarcoma-  
623 associated herpesvirus tegument protein ORF45. *PLoS One*. 2010;5(5):e10573.
- 624 41. Joo CH, Shin YC, Gack M, Wu L, Levy D, Jung JU. Inhibition of interferon regulatory factor  
625 7 (IRF7)-mediated interferon signal transduction by the Kaposi's sarcoma-associated herpesvirus  
626 viral IRF homolog vIRF3. *J Virol*. 2007;81(15):8282-92.
- 627 42. Lubyova B, Pitha PM. Characterization of a novel human herpesvirus 8-encoded protein,  
628 vIRF-3, that shows homology to viral and cellular interferon regulatory factors. *J Virol*.  
629 2000;74(17):8194-201.
- 630 43. Hwang SW, Kim D, Jung JU, Lee HR. KSHV-encoded viral interferon regulatory factor 4  
631 (vIRF4) interacts with IRF7 and inhibits interferon alpha production. *Biochem Biophys Res*  
632 *Commun*. 2017;486(3):700-5.
- 633 44. Shahnazaryan D, Khalil R, Wynne C, Jefferies CA, Ni Gabhann-Dromgoole J, Murphy CC.  
634 Herpes simplex virus 1 targets IRF7 via ICP0 to limit type I IFN induction. *Sci Rep*.  
635 2020;10(1):22216.
- 636 45. Lin R, Noyce RS, Collins SE, Everett RD, Mossman KL. The herpes simplex virus ICP0 RING  
637 finger domain inhibits IRF3- and IRF7-mediated activation of interferon-stimulated genes. *J Virol*.  
638 2004;78(4):1675-84.
- 639 46. Zhang L, Pagano JS. Interferon regulatory factor 7 is induced by Epstein-Barr virus latent  
640 membrane protein 1. *J Virol*. 2000;74(3):1061-8.
- 641 47. Ning S, Campos AD, Darnay BG, Bentz GL, Pagano JS. TRAF6 and the three C-terminal  
642 lysine sites on IRF7 are required for its ubiquitination-mediated activation by the tumor necrosis  
643 factor receptor family member latent membrane protein 1. *Mol Cell Biol*. 2008;28(20):6536-46.
- 644 48. Huye LE, Ning S, Kelliher M, Pagano JS. Interferon regulatory factor 7 is activated by a viral  
645 oncoprotein through RIP-dependent ubiquitination. *Mol Cell Biol*. 2007;27(8):2910-8.
- 646 49. Zhang L, Pagano JS. Interferon regulatory factor 7 mediates activation of Tap-2 by Epstein-  
647 Barr virus latent membrane protein 1. *J Virol*. 2001;75(1):341-50.
- 648 50. Zhang L, Pagano JS. IRF-7, a new interferon regulatory factor associated with Epstein-Barr  
649 virus latency. *Mol Cell Biol*. 1997;17(10):5748-57.
- 650 51. Hahn AM, Huye LE, Ning S, Webster-Cyriaque J, Pagano JS. Interferon regulatory factor 7  
651 is negatively regulated by the Epstein-Barr virus immediate-early gene, BZLF-1. *J Virol*.  
652 2005;79(15):10040-52.
- 653 52. Wu L, Fossum E, Joo CH, Inn KS, Shin YC, Johannsen E, et al. Epstein-Barr virus LF2: an  
654 antagonist to type I interferon. *J Virol*. 2009;83(2):1140-6.
- 655 53. Bentz GL, Liu R, Hahn AM, Shackelford J, Pagano JS. Epstein-Barr virus BRLF1 inhibits  
656 transcription of IRF3 and IRF7 and suppresses induction of interferon-beta. *Virology*.  
657 2010;402(1):121-8.

- 658 54. Iempridee T, Das S, Xu I, Mertz JE. Transforming growth factor beta-induced reactivation  
659 of Epstein-Barr virus involves multiple Smad-binding elements cooperatively activating  
660 expression of the latent-lytic switch BZLF1 gene. *J Virol*. 2011;85(15):7836-48.
- 661 55. Prokova V, Mosialos G, Kardassis D. Inhibition of transforming growth factor beta  
662 signaling and Smad-dependent activation of transcription by the Latent Membrane Protein 1 of  
663 Epstein-Barr virus. *J Biol Chem*. 2002;277(11):9342-50.
- 664 56. Mori N, Morishita M, Tsukazaki T, Yamamoto N. Repression of Smad-dependent  
665 transforming growth factor-beta signaling by Epstein-Barr virus latent membrane protein 1  
666 through nuclear factor-kappaB. *Int J Cancer*. 2003;105(5):661-8.
- 667 57. Wood VH, O'Neil JD, Wei W, Stewart SE, Dawson CW, Young LS. Epstein-Barr virus-  
668 encoded EBNA1 regulates cellular gene transcription and modulates the STAT1 and TGFbeta  
669 signaling pathways. *Oncogene*. 2007;26(28):4135-47.
- 670 58. Kim DH, Chang MS, Yoon CJ, Middeldorp JM, Martinez OM, Byeon SJ, et al. Epstein-Barr  
671 virus BARP1-induced NFkappaB/miR-146a/SMAD4 alterations in stomach cancer cells.  
672 *Oncotarget*. 2016;7(50):82213-27.
- 673 59. Motsch N, Pfuhl T, Mrazek J, Barth S, Grasser FA. Epstein-Barr virus-encoded latent  
674 membrane protein 1 (LMP1) induces the expression of the cellular microRNA miR-146a. *RNA Biol*.  
675 2007;4(3):131-7.
- 676 60. Choi HS, Jain V, Krueger B, Marshall V, Kim CH, Shisler JL, et al. Kaposi's Sarcoma-  
677 Associated Herpesvirus (KSHV) Induces the Oncogenic miR-17-92 Cluster and Down-Regulates  
678 TGF-beta Signaling. *PLoS Pathog*. 2015;11(11):e1005255.
- 679 61. Di Bartolo DL, Cannon M, Liu YF, Renne R, Chadburn A, Boshoff C, et al. KSHV LANA inhibits  
680 TGF-beta signaling through epigenetic silencing of the TGF-beta type II receptor. *Blood*.  
681 2008;111(9):4731-40.
- 682 62. Seo T, Park J, Choe J. Kaposi's sarcoma-associated herpesvirus viral IFN regulatory factor  
683 1 inhibits transforming growth factor-beta signaling. *Cancer Res*. 2005;65(5):1738-47.
- 684 63. Tomita M, Choe J, Tsukazaki T, Mori N. The Kaposi's sarcoma-associated herpesvirus K-  
685 bZIP protein represses transforming growth factor beta signaling through interaction with CREB-  
686 binding protein. *Oncogene*. 2004;23(50):8272-81.
- 687 64. Lei X, Zhu Y, Jones T, Bai Z, Huang Y, Gao SJ. A Kaposi's sarcoma-associated herpesvirus  
688 microRNA and its variants target the transforming growth factor beta pathway to promote cell  
689 survival. *J Virol*. 2012;86(21):11698-711.
- 690 65. Samols MA, Skalsky RL, Maldonado AM, Riva A, Lopez MC, Baker HV, et al. Identification  
691 of cellular genes targeted by KSHV-encoded microRNAs. *PLoS Pathog*. 2007;3(5):e65.
- 692 66. Mendez-Samperio P, Hernandez M, Ayala HE. Induction of transforming growth factor-  
693 beta 1 production in human cells by herpes simplex virus. *J Interferon Cytokine Res*.  
694 2000;20(3):273-80.
- 695 67. Allen SJ, Mott KR, Wechsler SL, Flavell RA, Town T, Ghiasi H. Adaptive and innate  
696 transforming growth factor beta signaling impact herpes simplex virus 1 latency and reactivation.  
697 *J Virol*. 2011;85(21):11448-56.
- 698 68. Shimamura M, Murphy-Ullrich JE, Britt WJ. Human cytomegalovirus induces TGF-beta1  
699 activation in renal tubular epithelial cells after epithelial-to-mesenchymal transition. *PLoS*  
700 *Pathog*. 2010;6(11):e1001170.

- 701 69. Lau B, Poole E, Krishna B, Sellart I, Wills MR, Murphy E, et al. The Expression of Human  
702 Cytomegalovirus MicroRNA MiR-UL148D during Latent Infection in Primary Myeloid Cells Inhibits  
703 Activin A-triggered Secretion of IL-6. *Sci Rep.* 2016;6:31205.
- 704 70. Umashankar M, Petrucelli A, Cicchini L, Caposio P, Kreklywich CN, Rak M, et al. A novel  
705 human cytomegalovirus locus modulates cell type-specific outcomes of infection. *PLoS Pathog.*  
706 2011;7(12):e1002444.
- 707 71. Botto S, Abraham J, Mizuno N, Pryke K, Gall B, Landais I, et al. Human Cytomegalovirus  
708 Immediate Early 86-kDa Protein Blocks Transcription and Induces Degradation of the Immature  
709 Interleukin-1beta Protein during Virion-Mediated Activation of the AIM2 Inflammasome. *mBio.*  
710 2019;10(1).
- 711

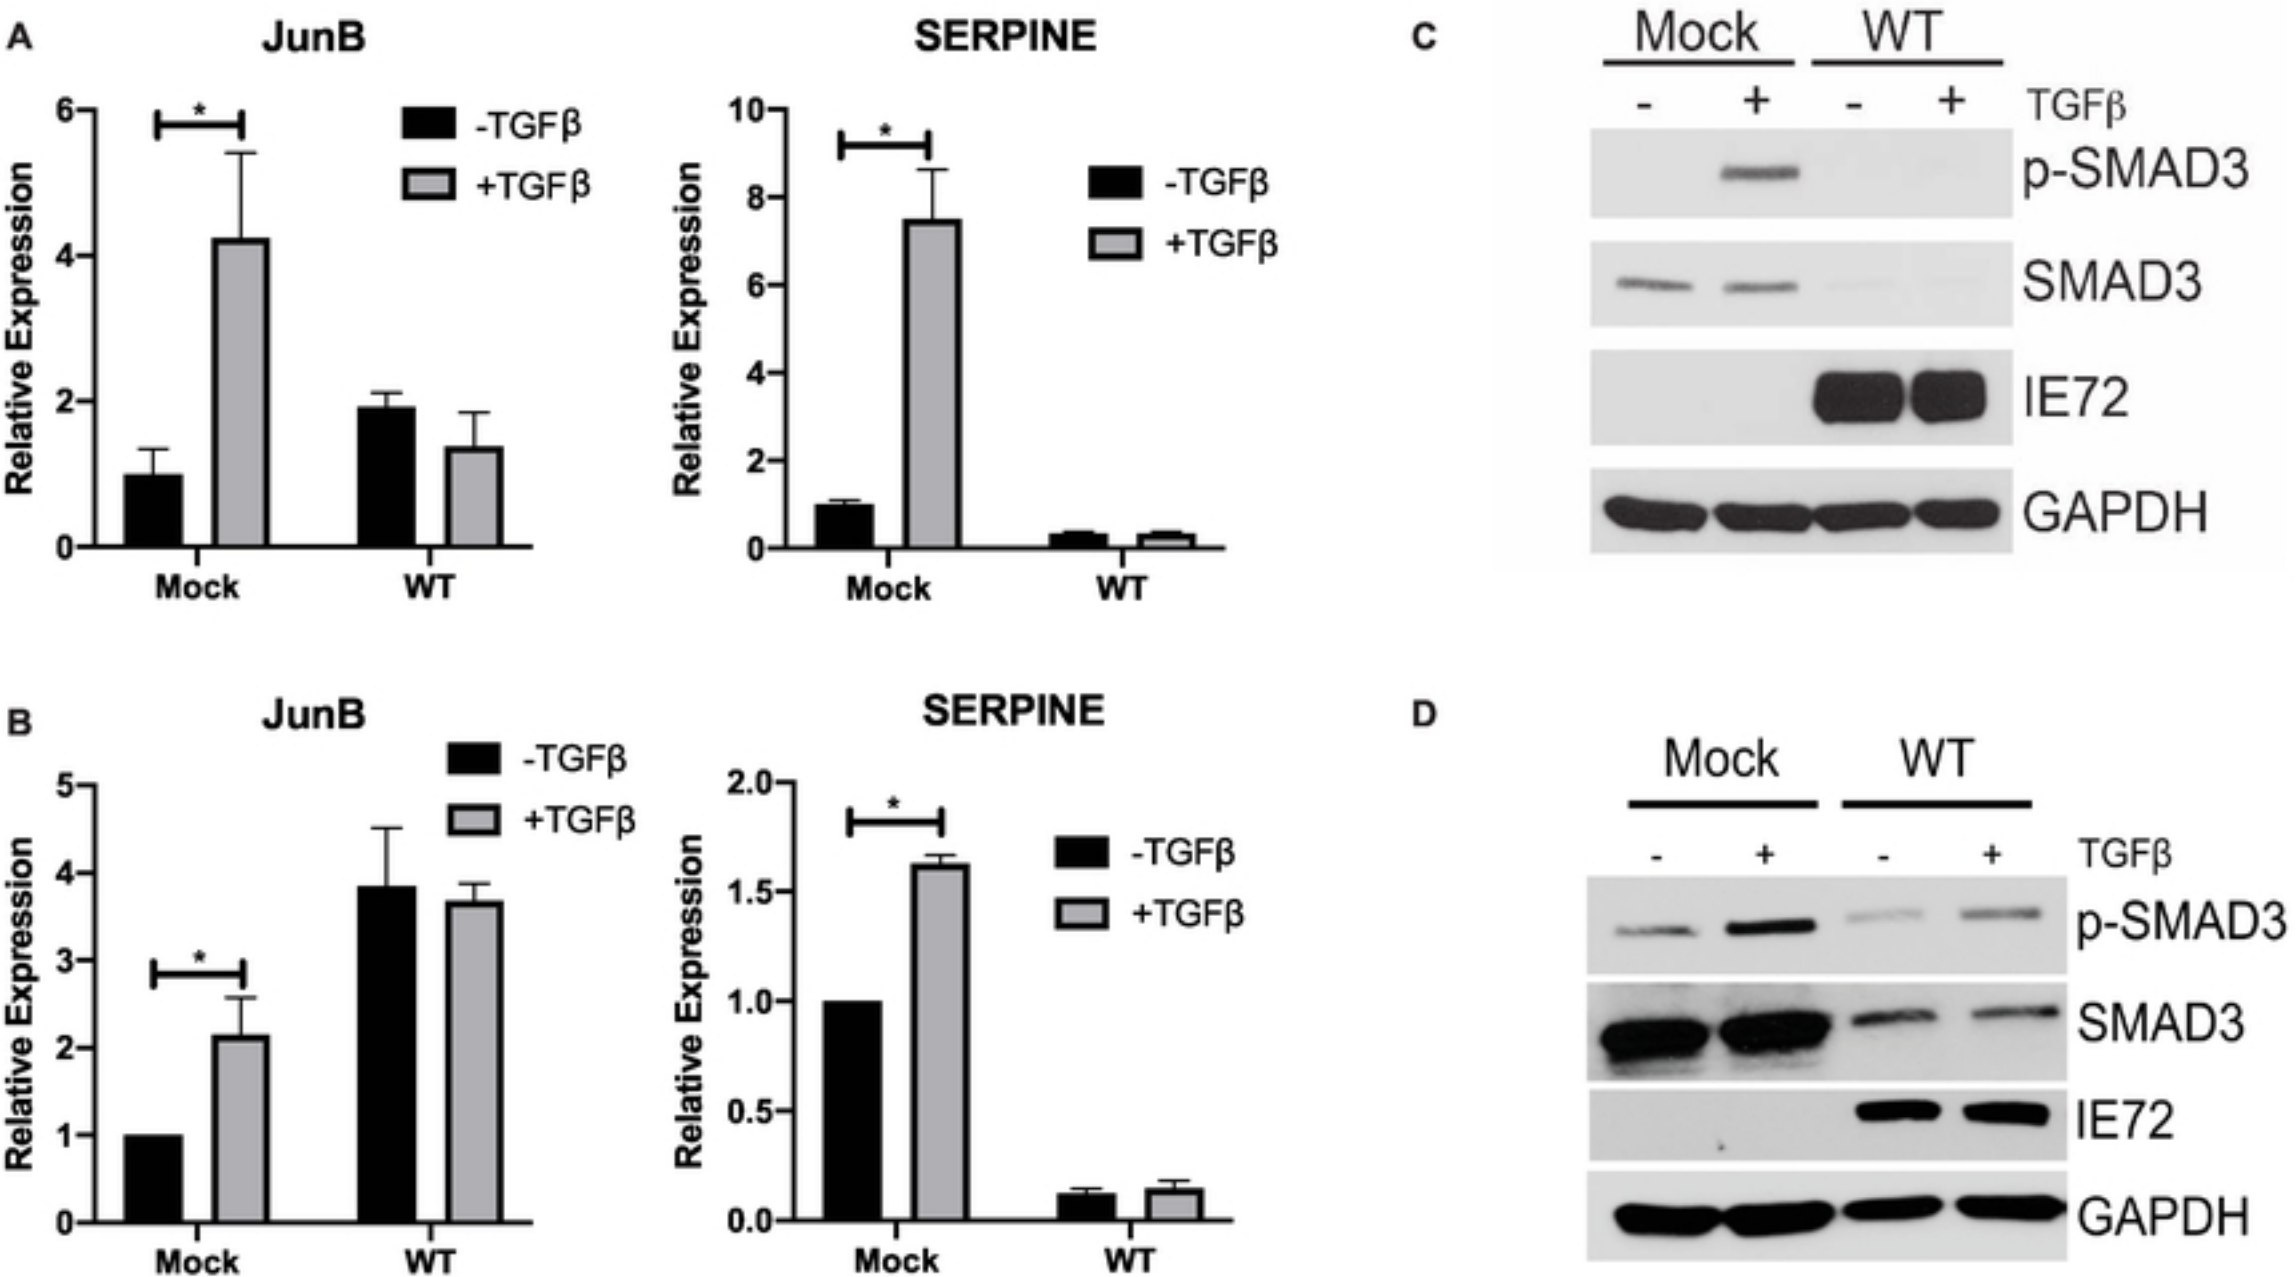

Figure 1

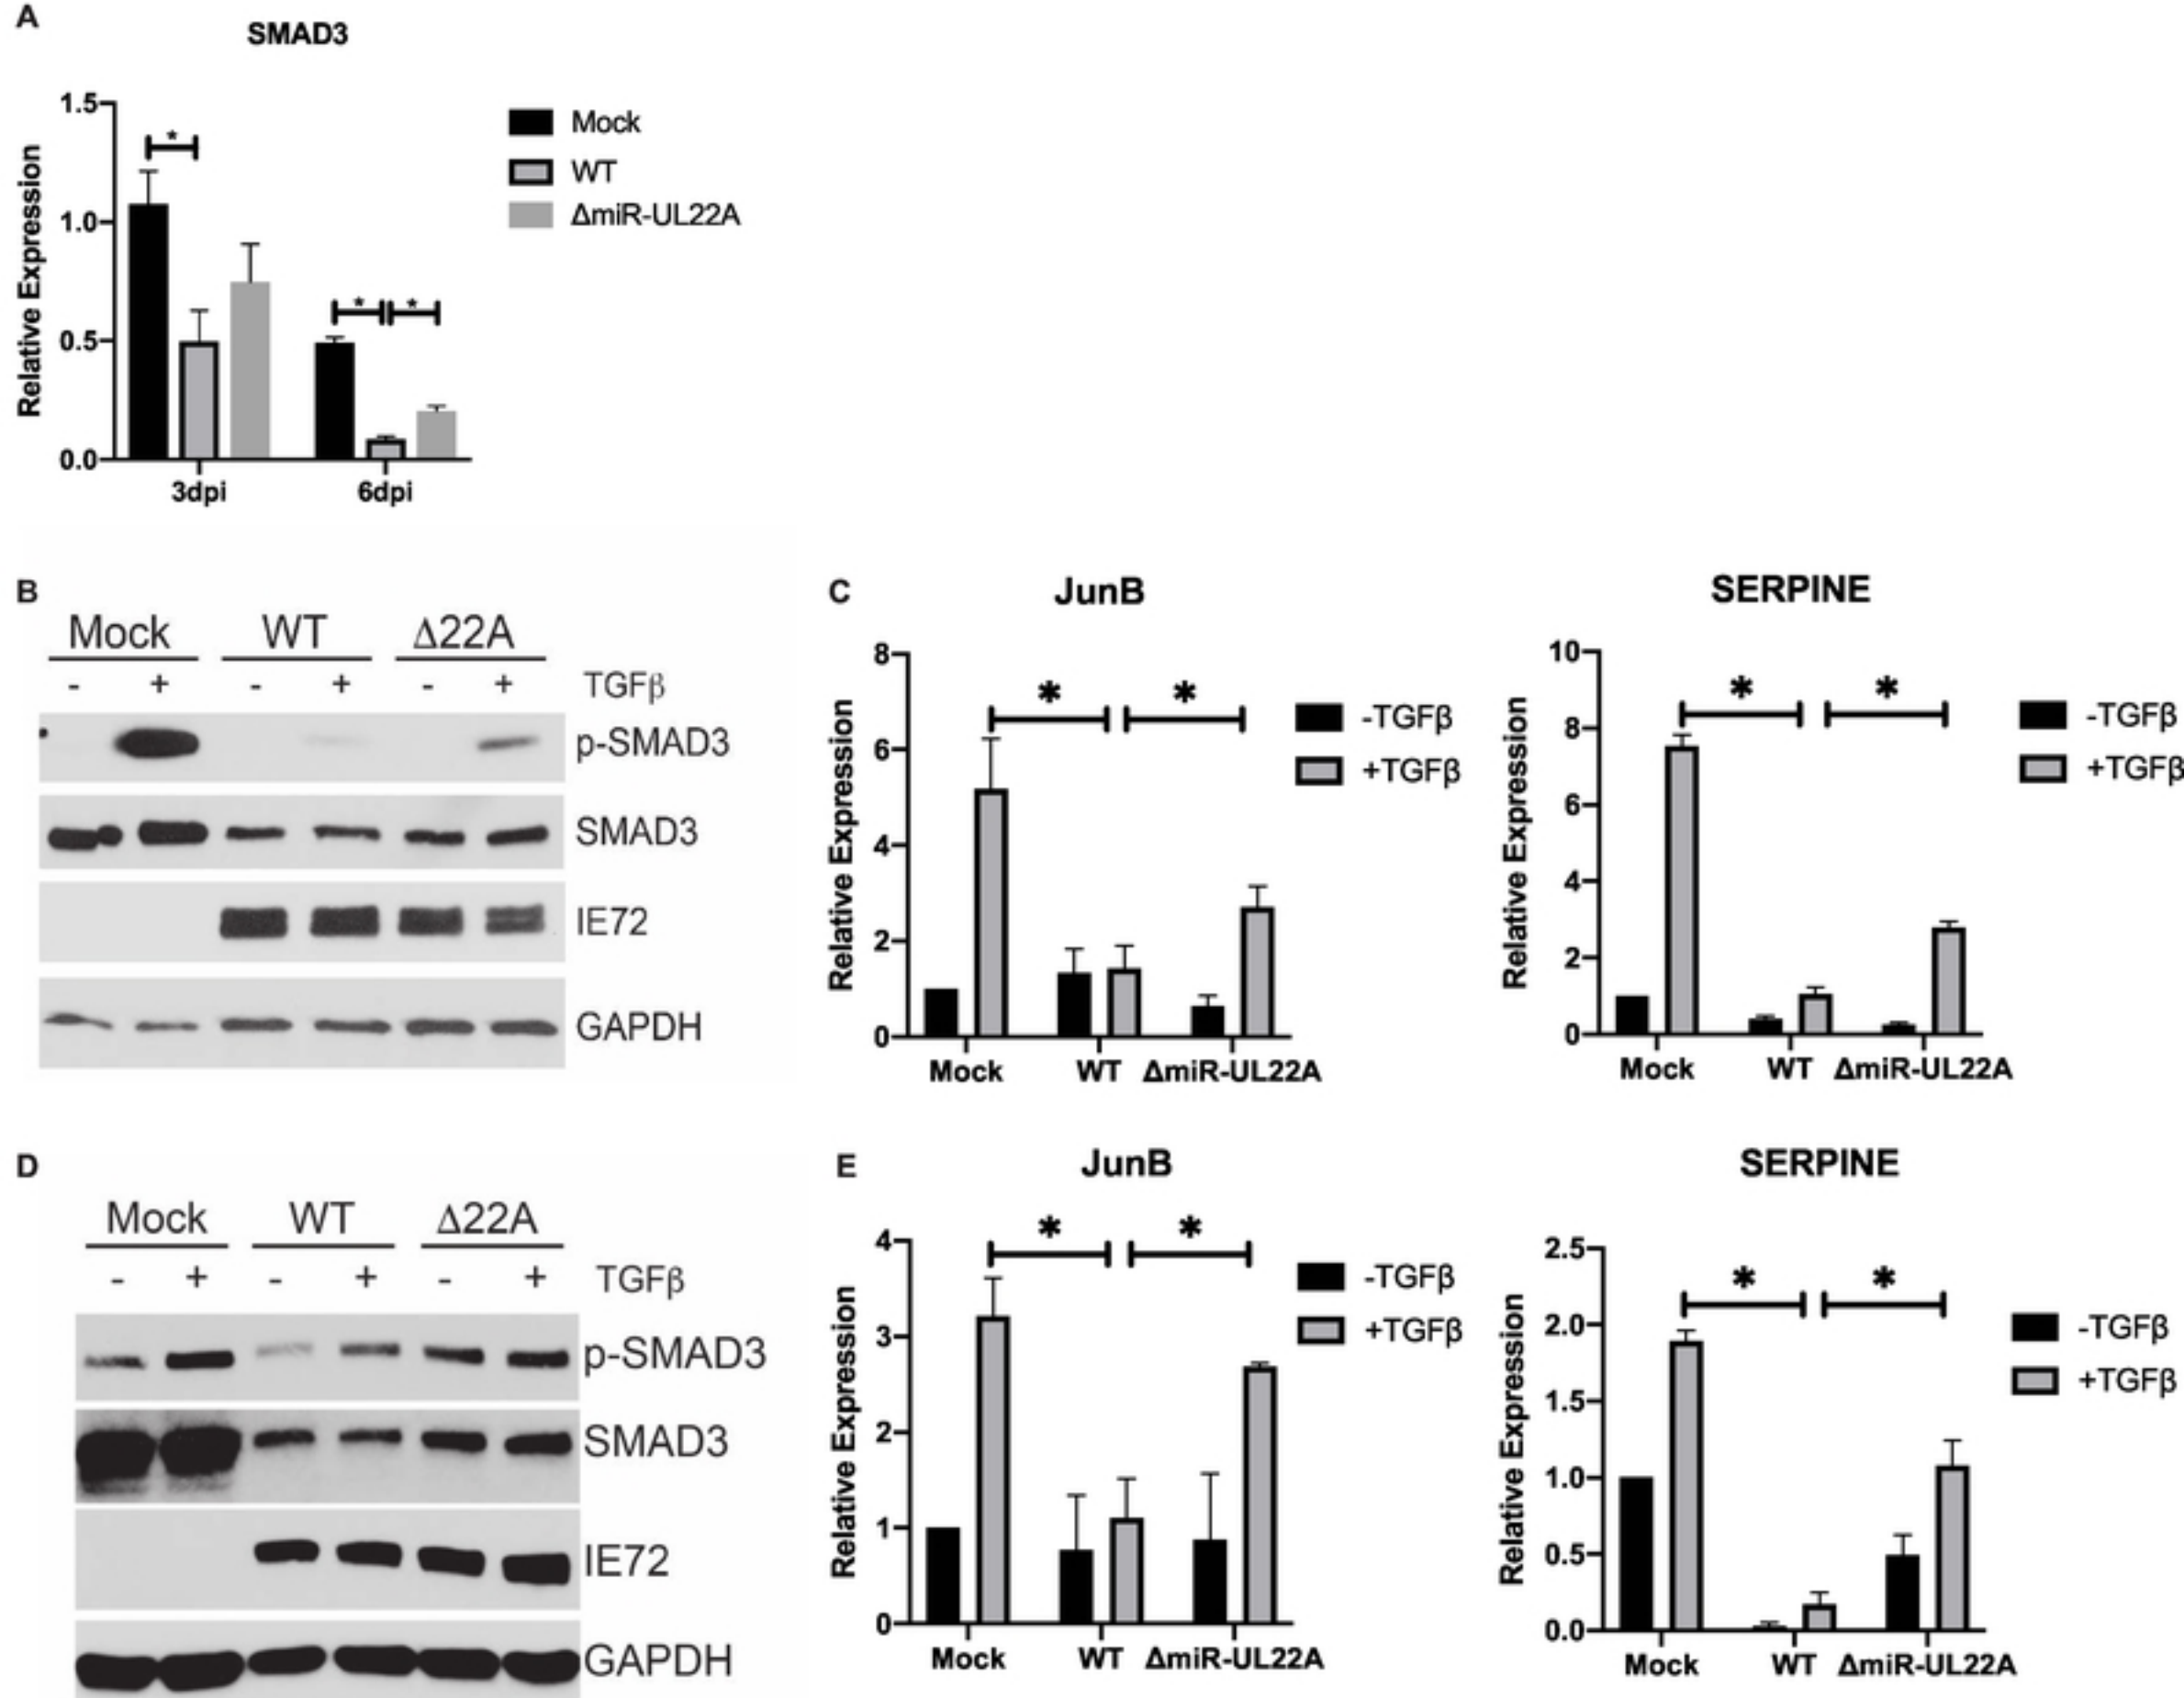

Figure 2



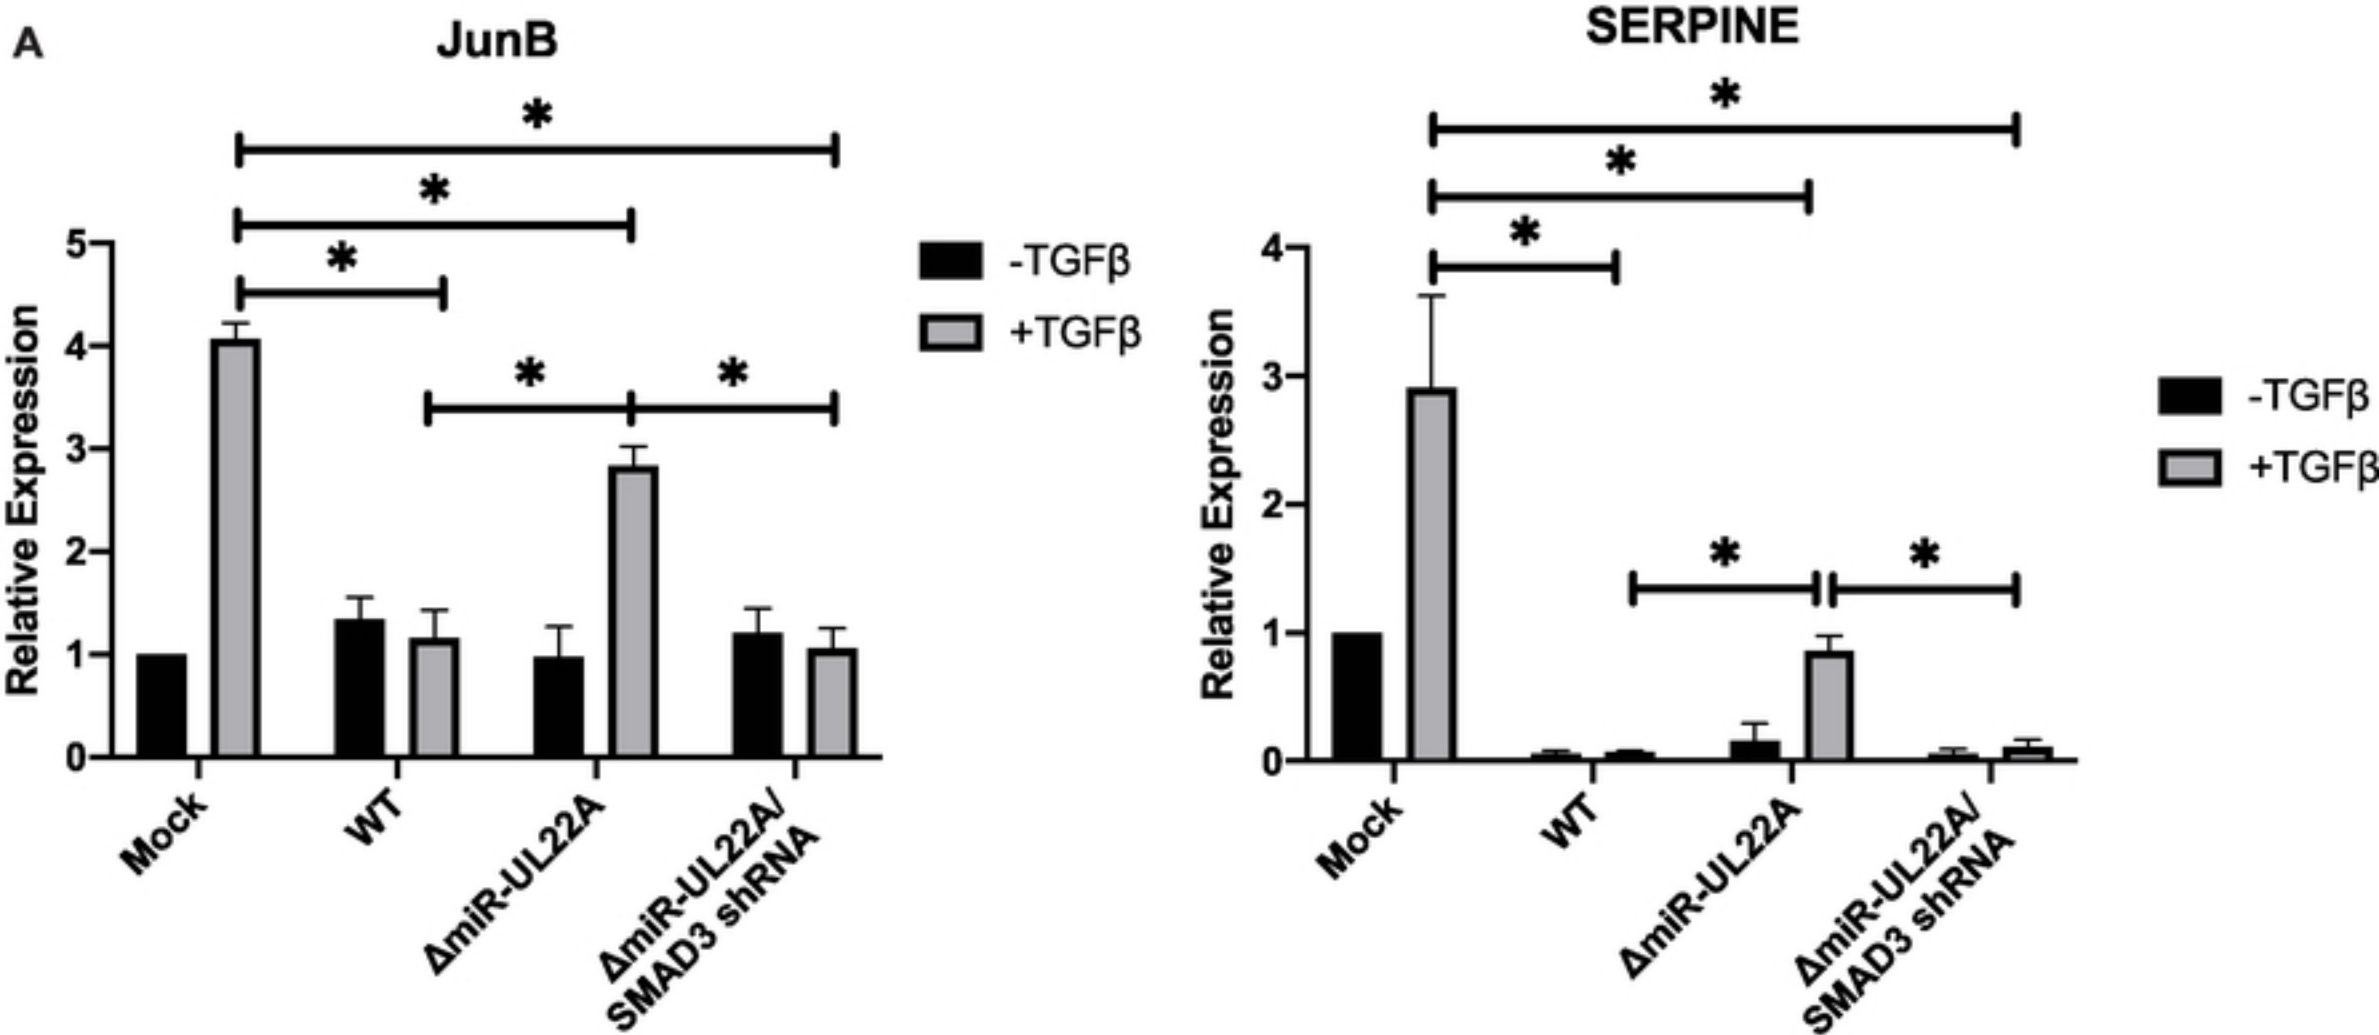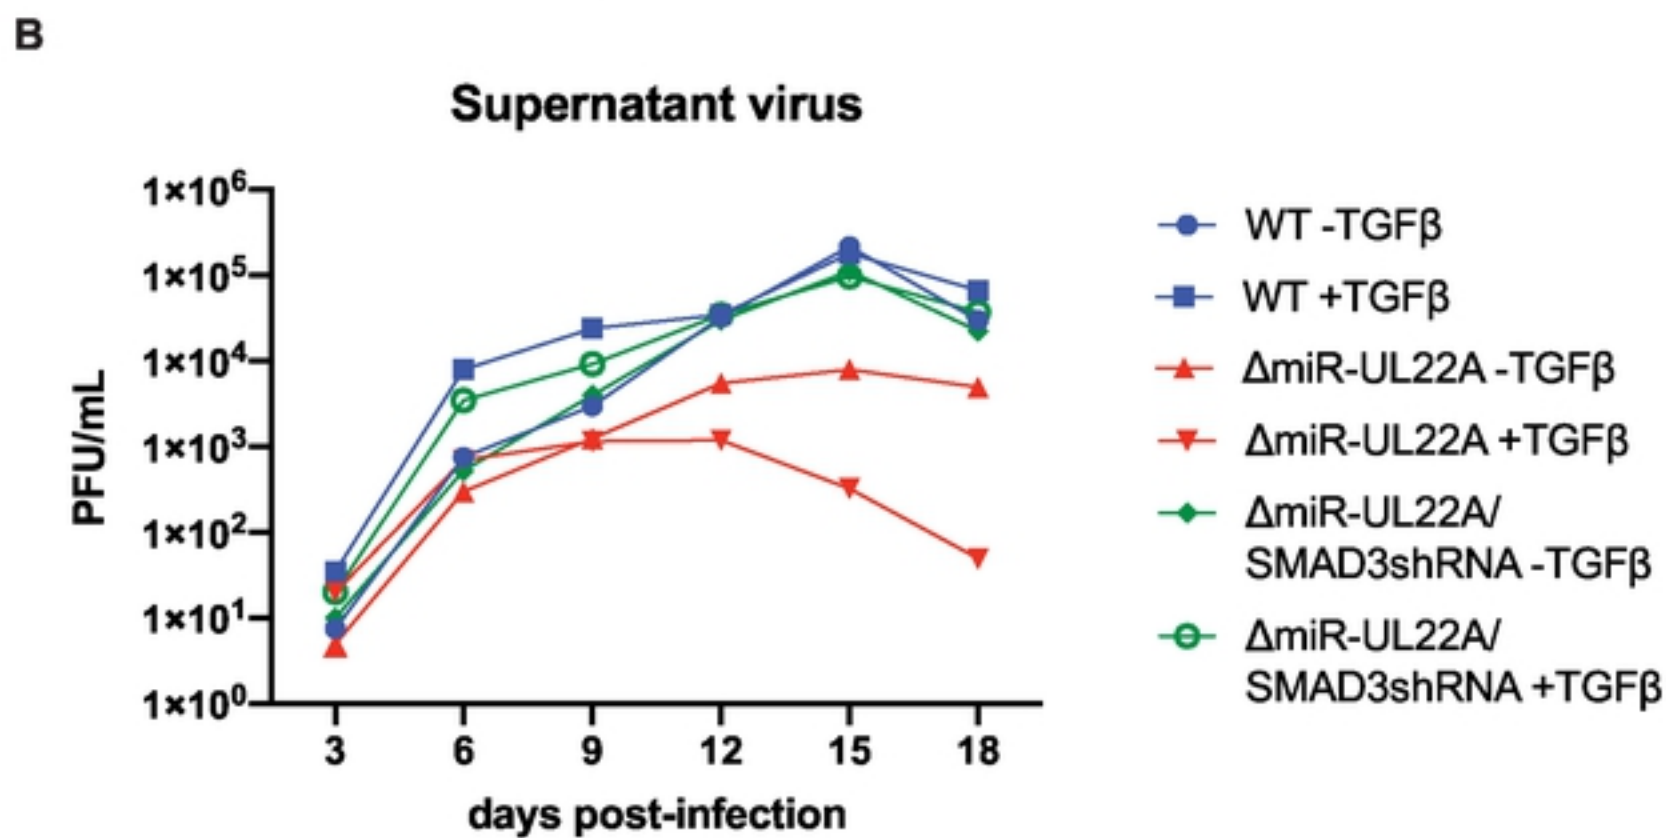

Figure 3

A

IFN $\beta$ 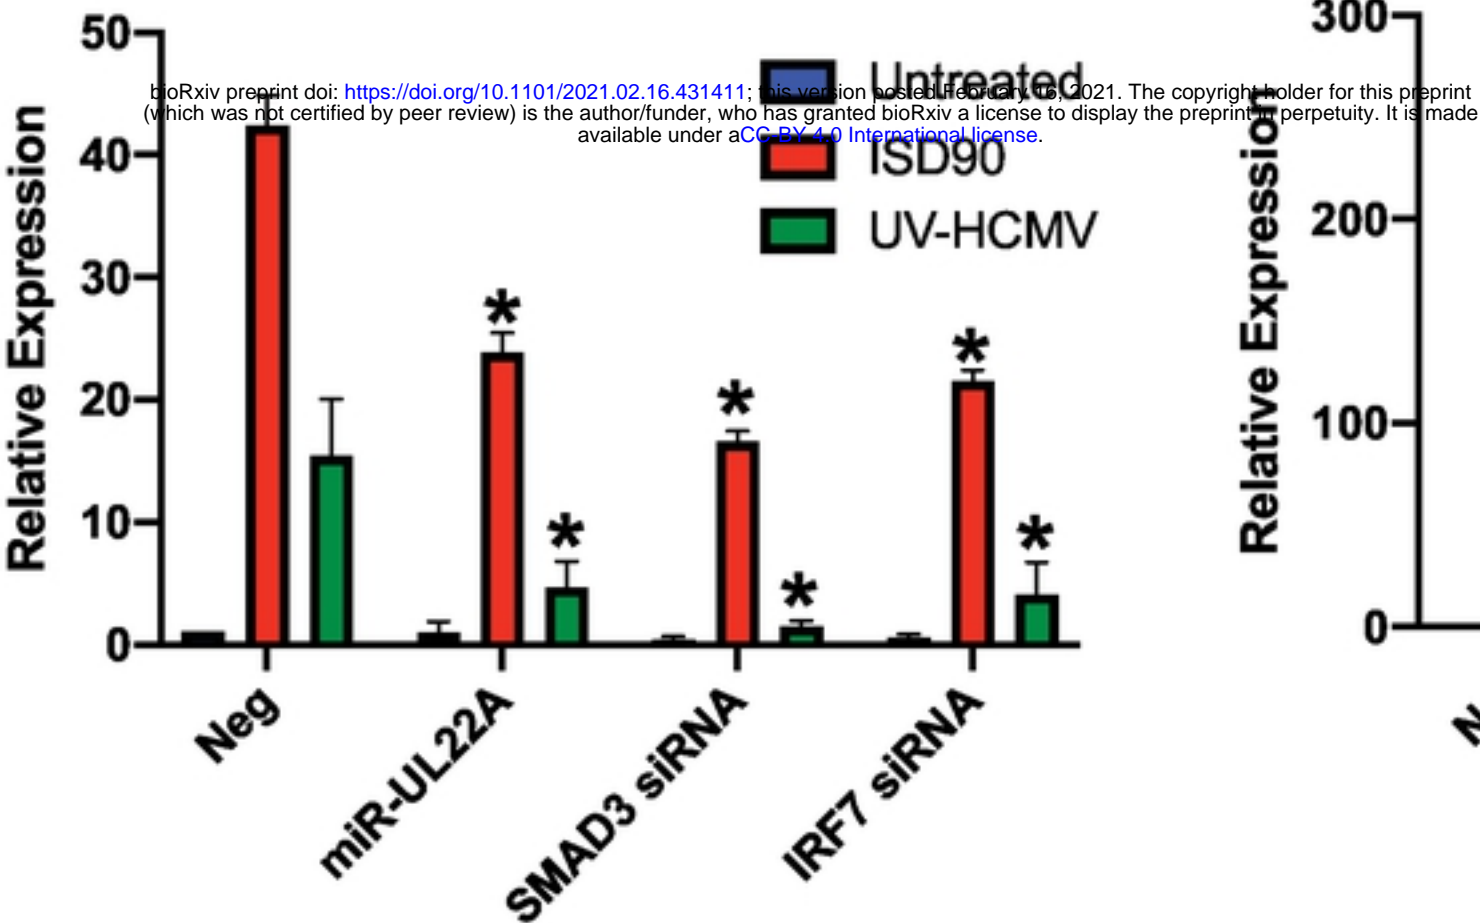

B

IFN $\beta$ 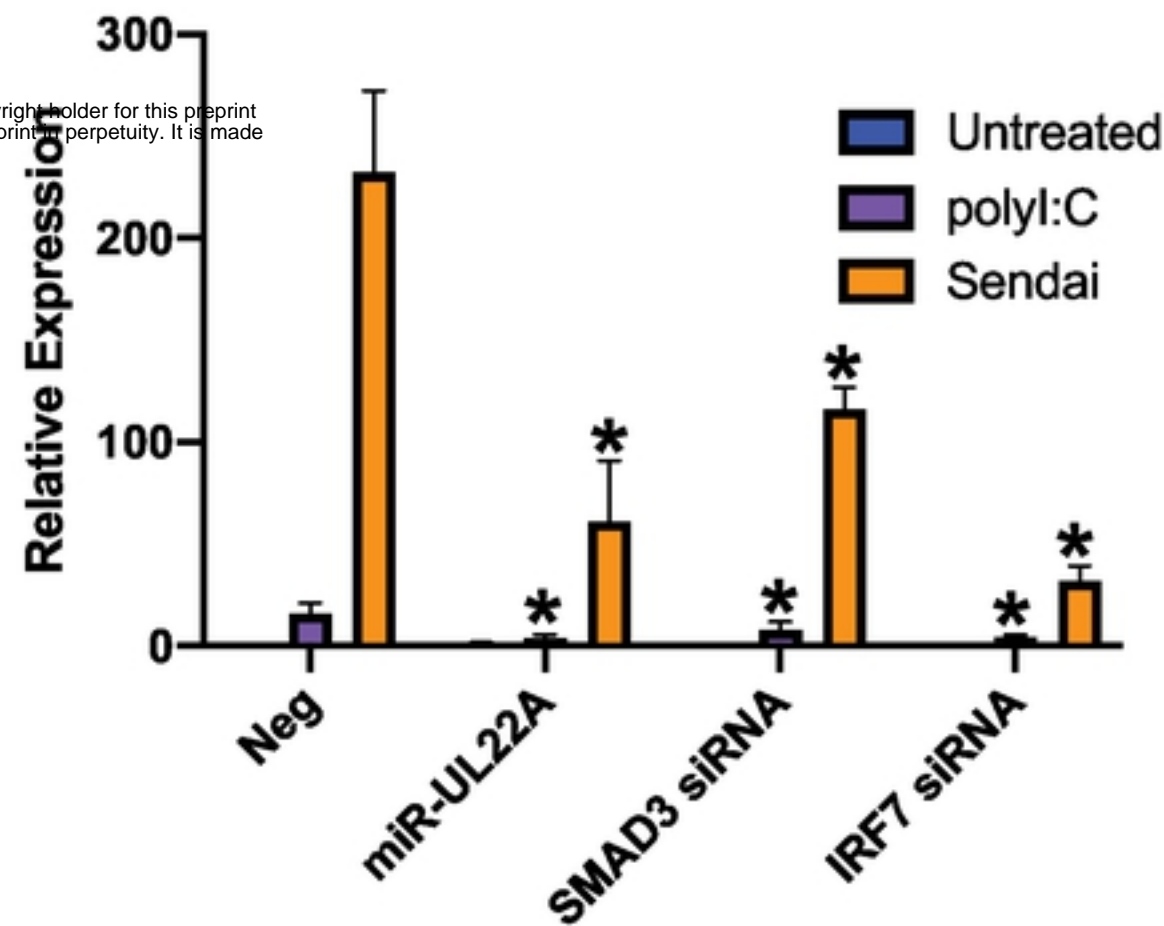

C

RSAD2

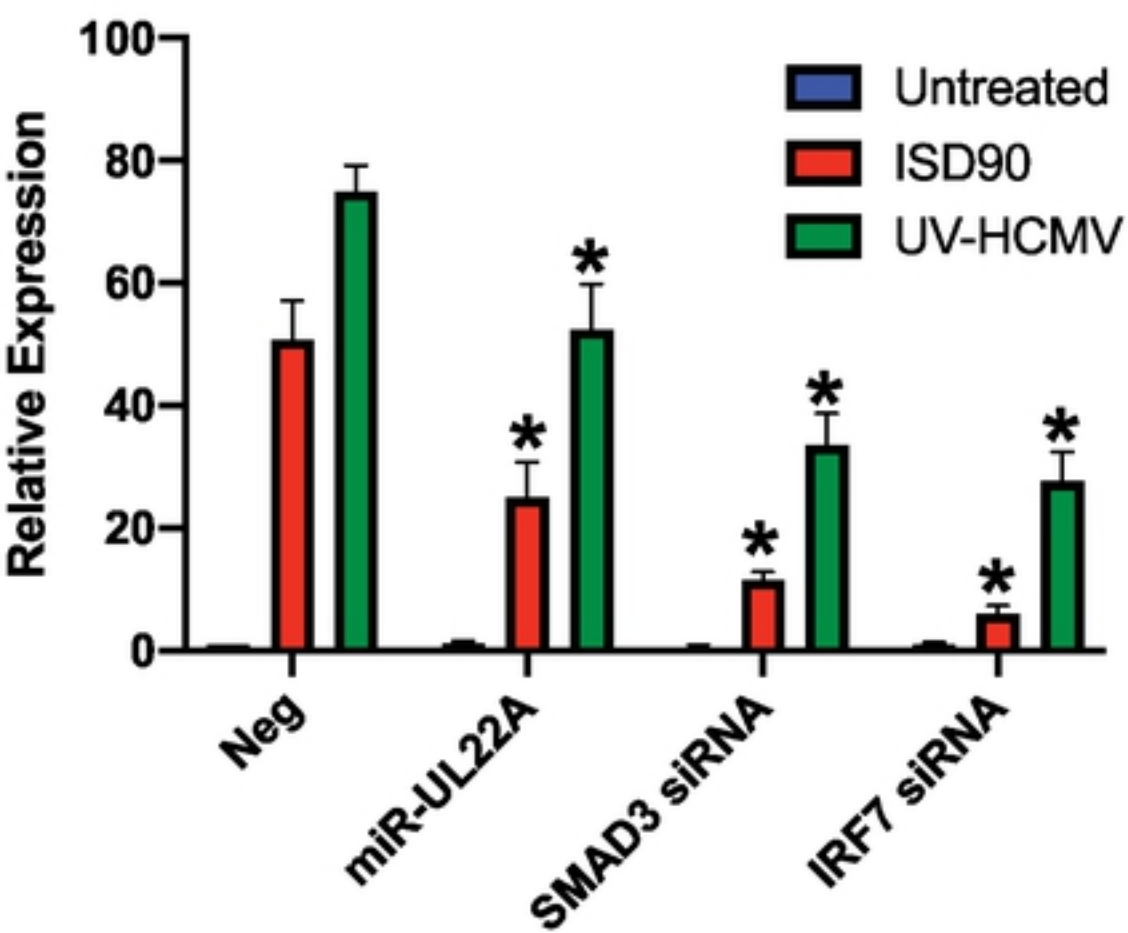

D

RSAD2

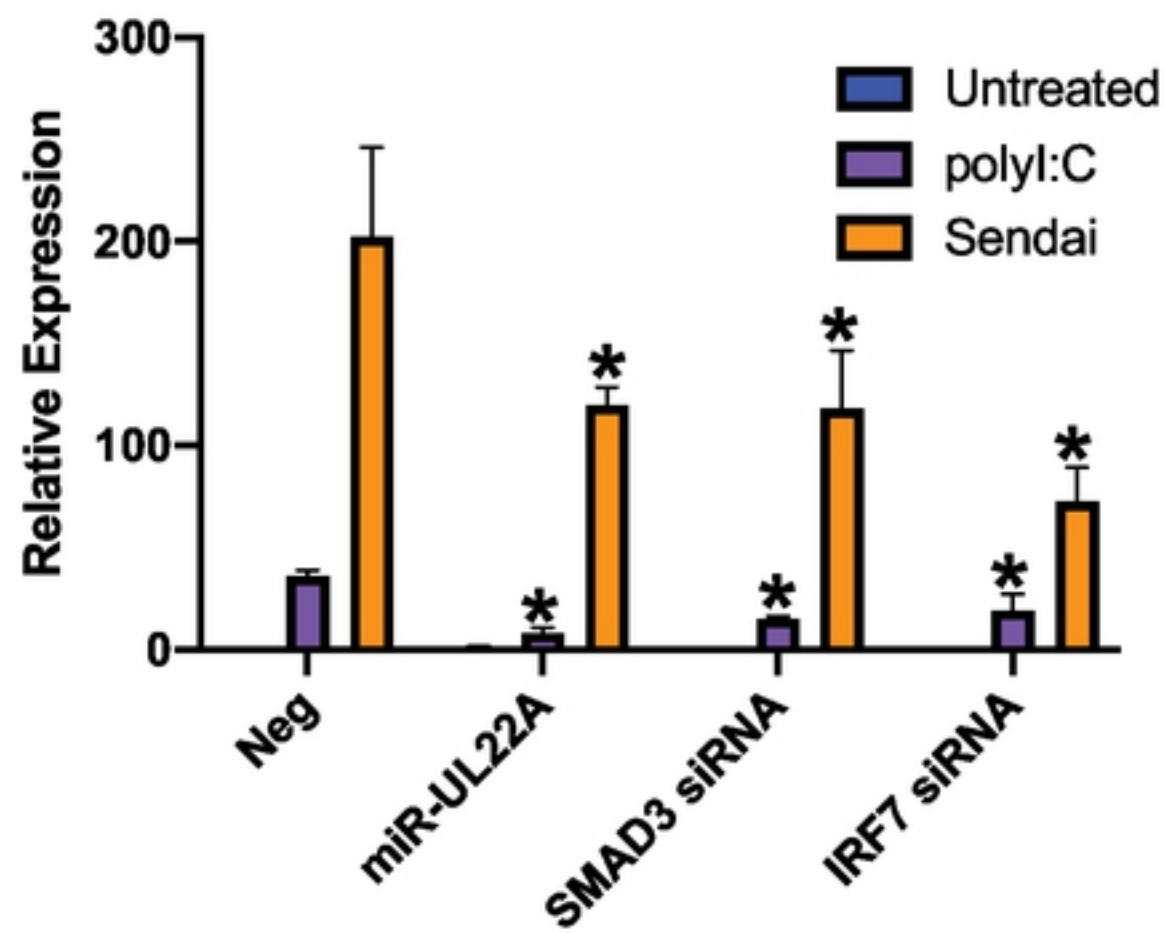

Figure 4



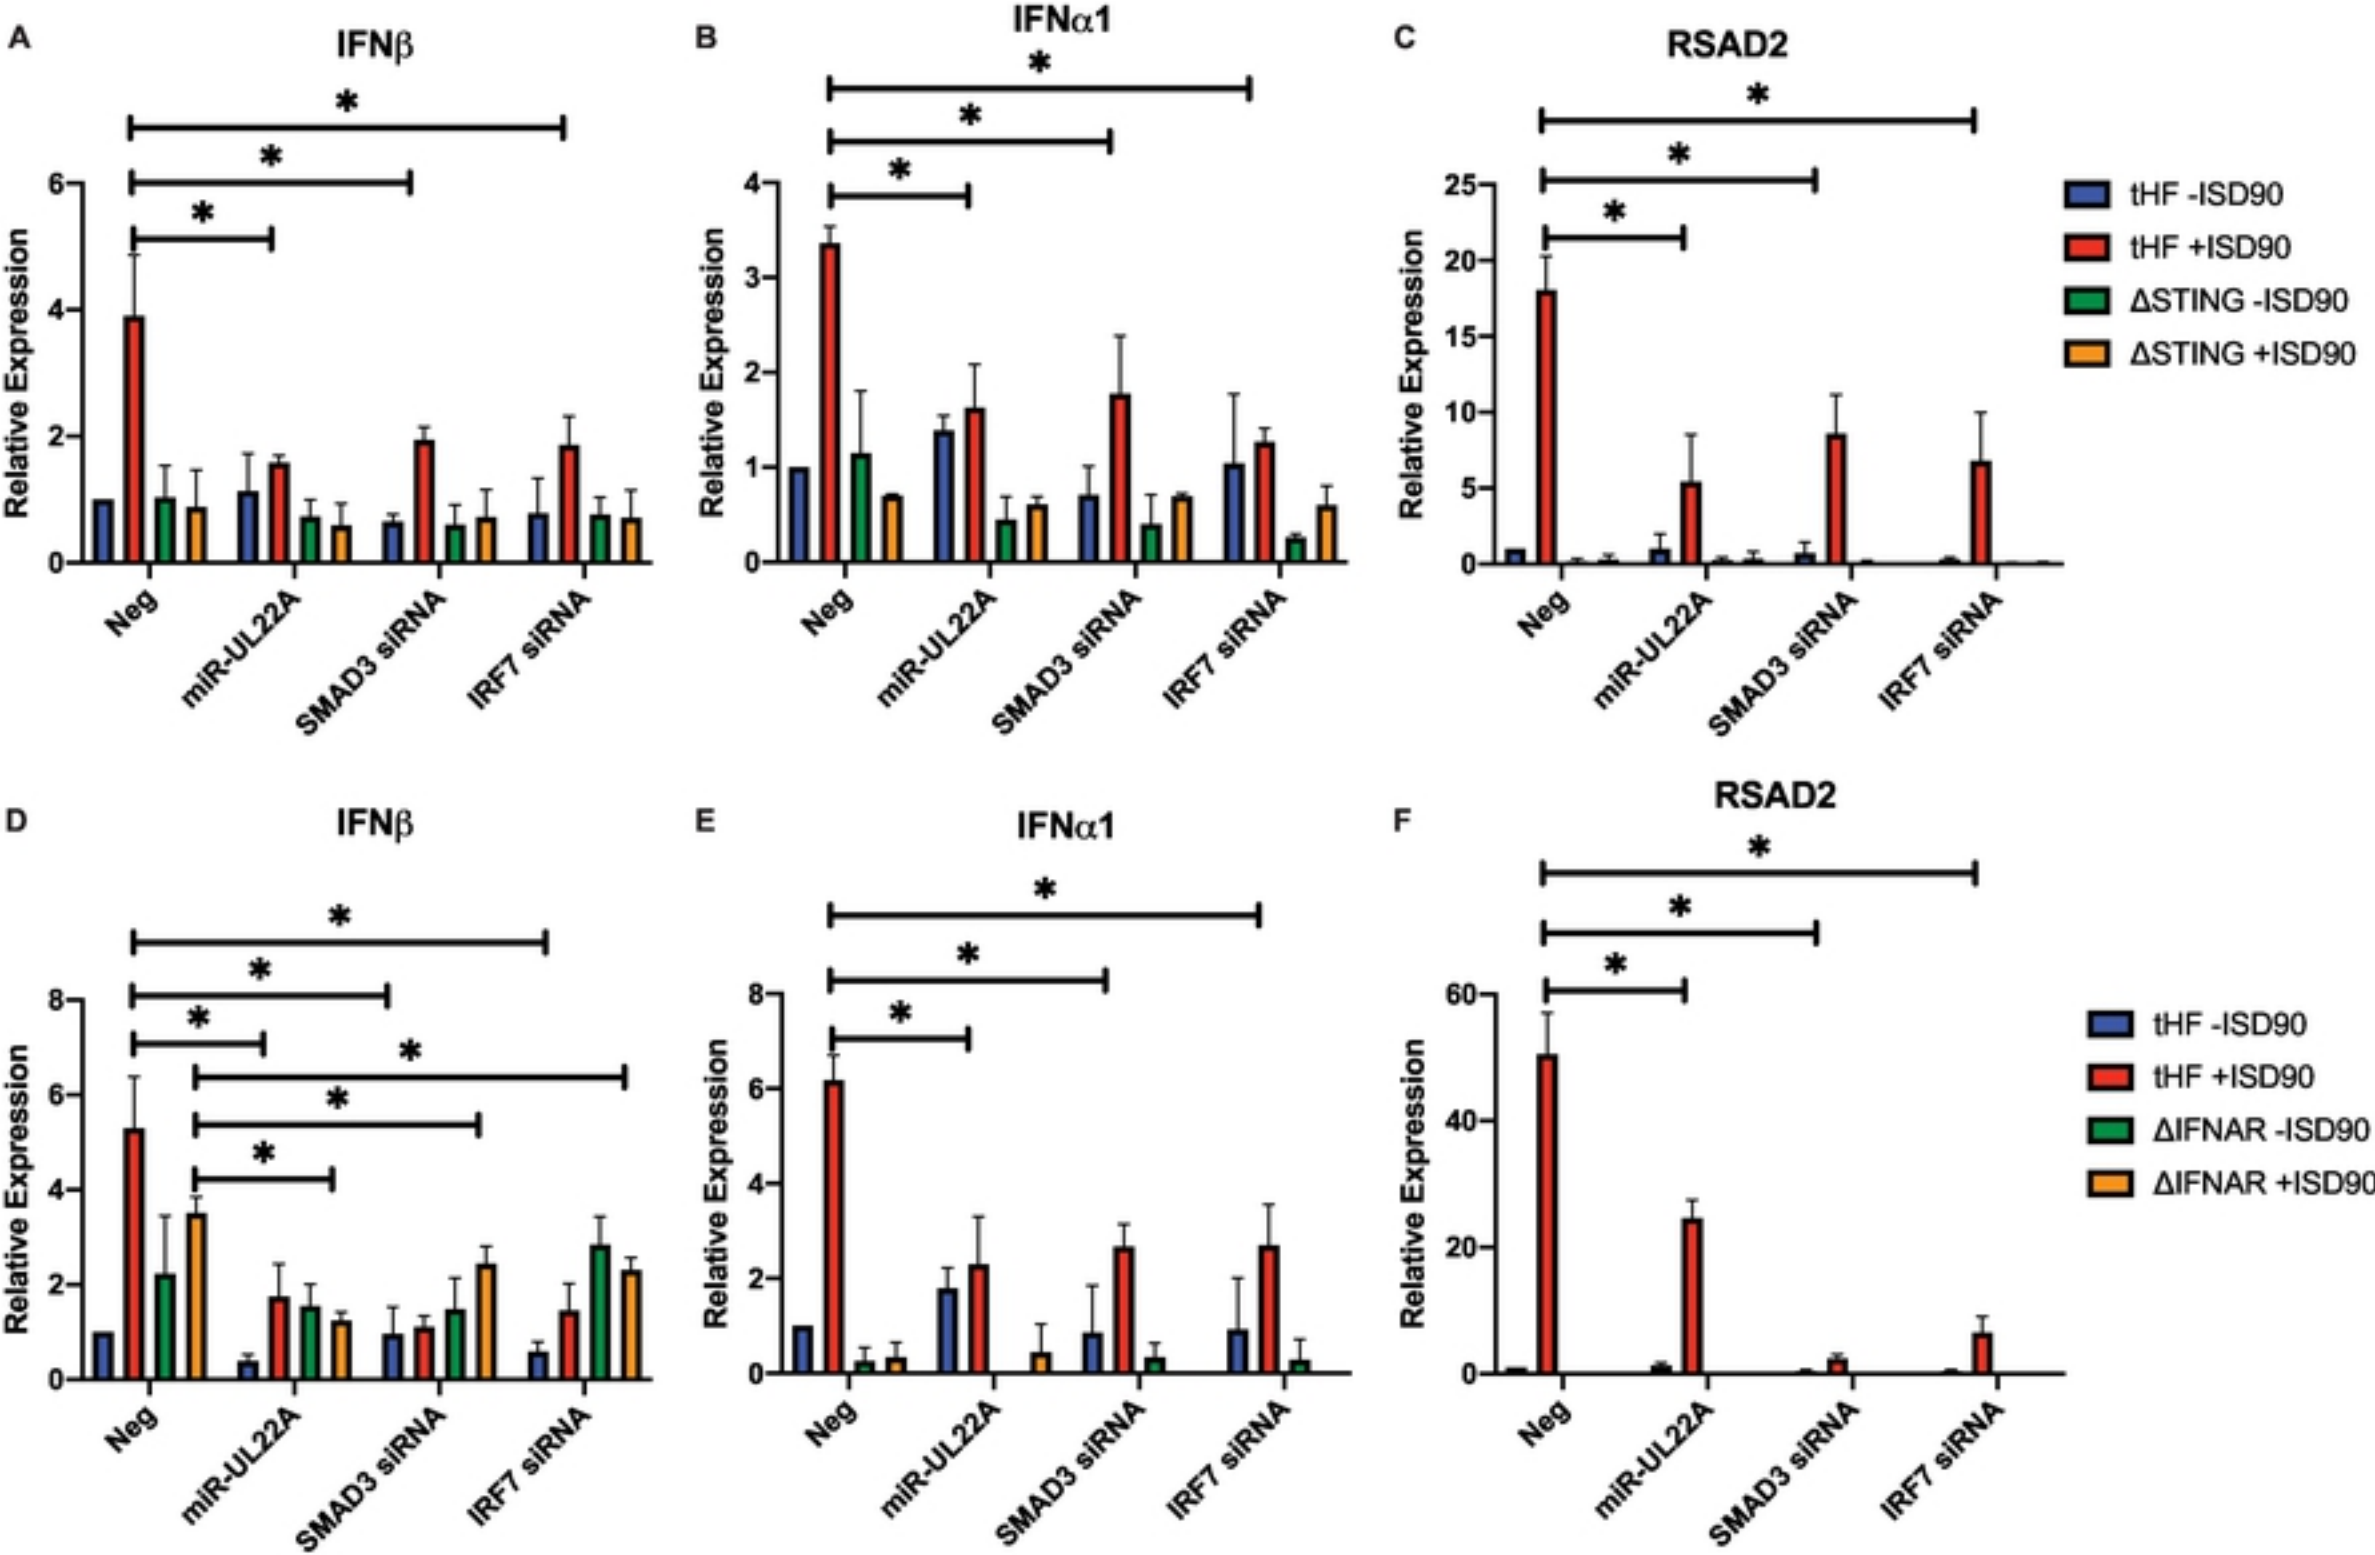

Figure 5

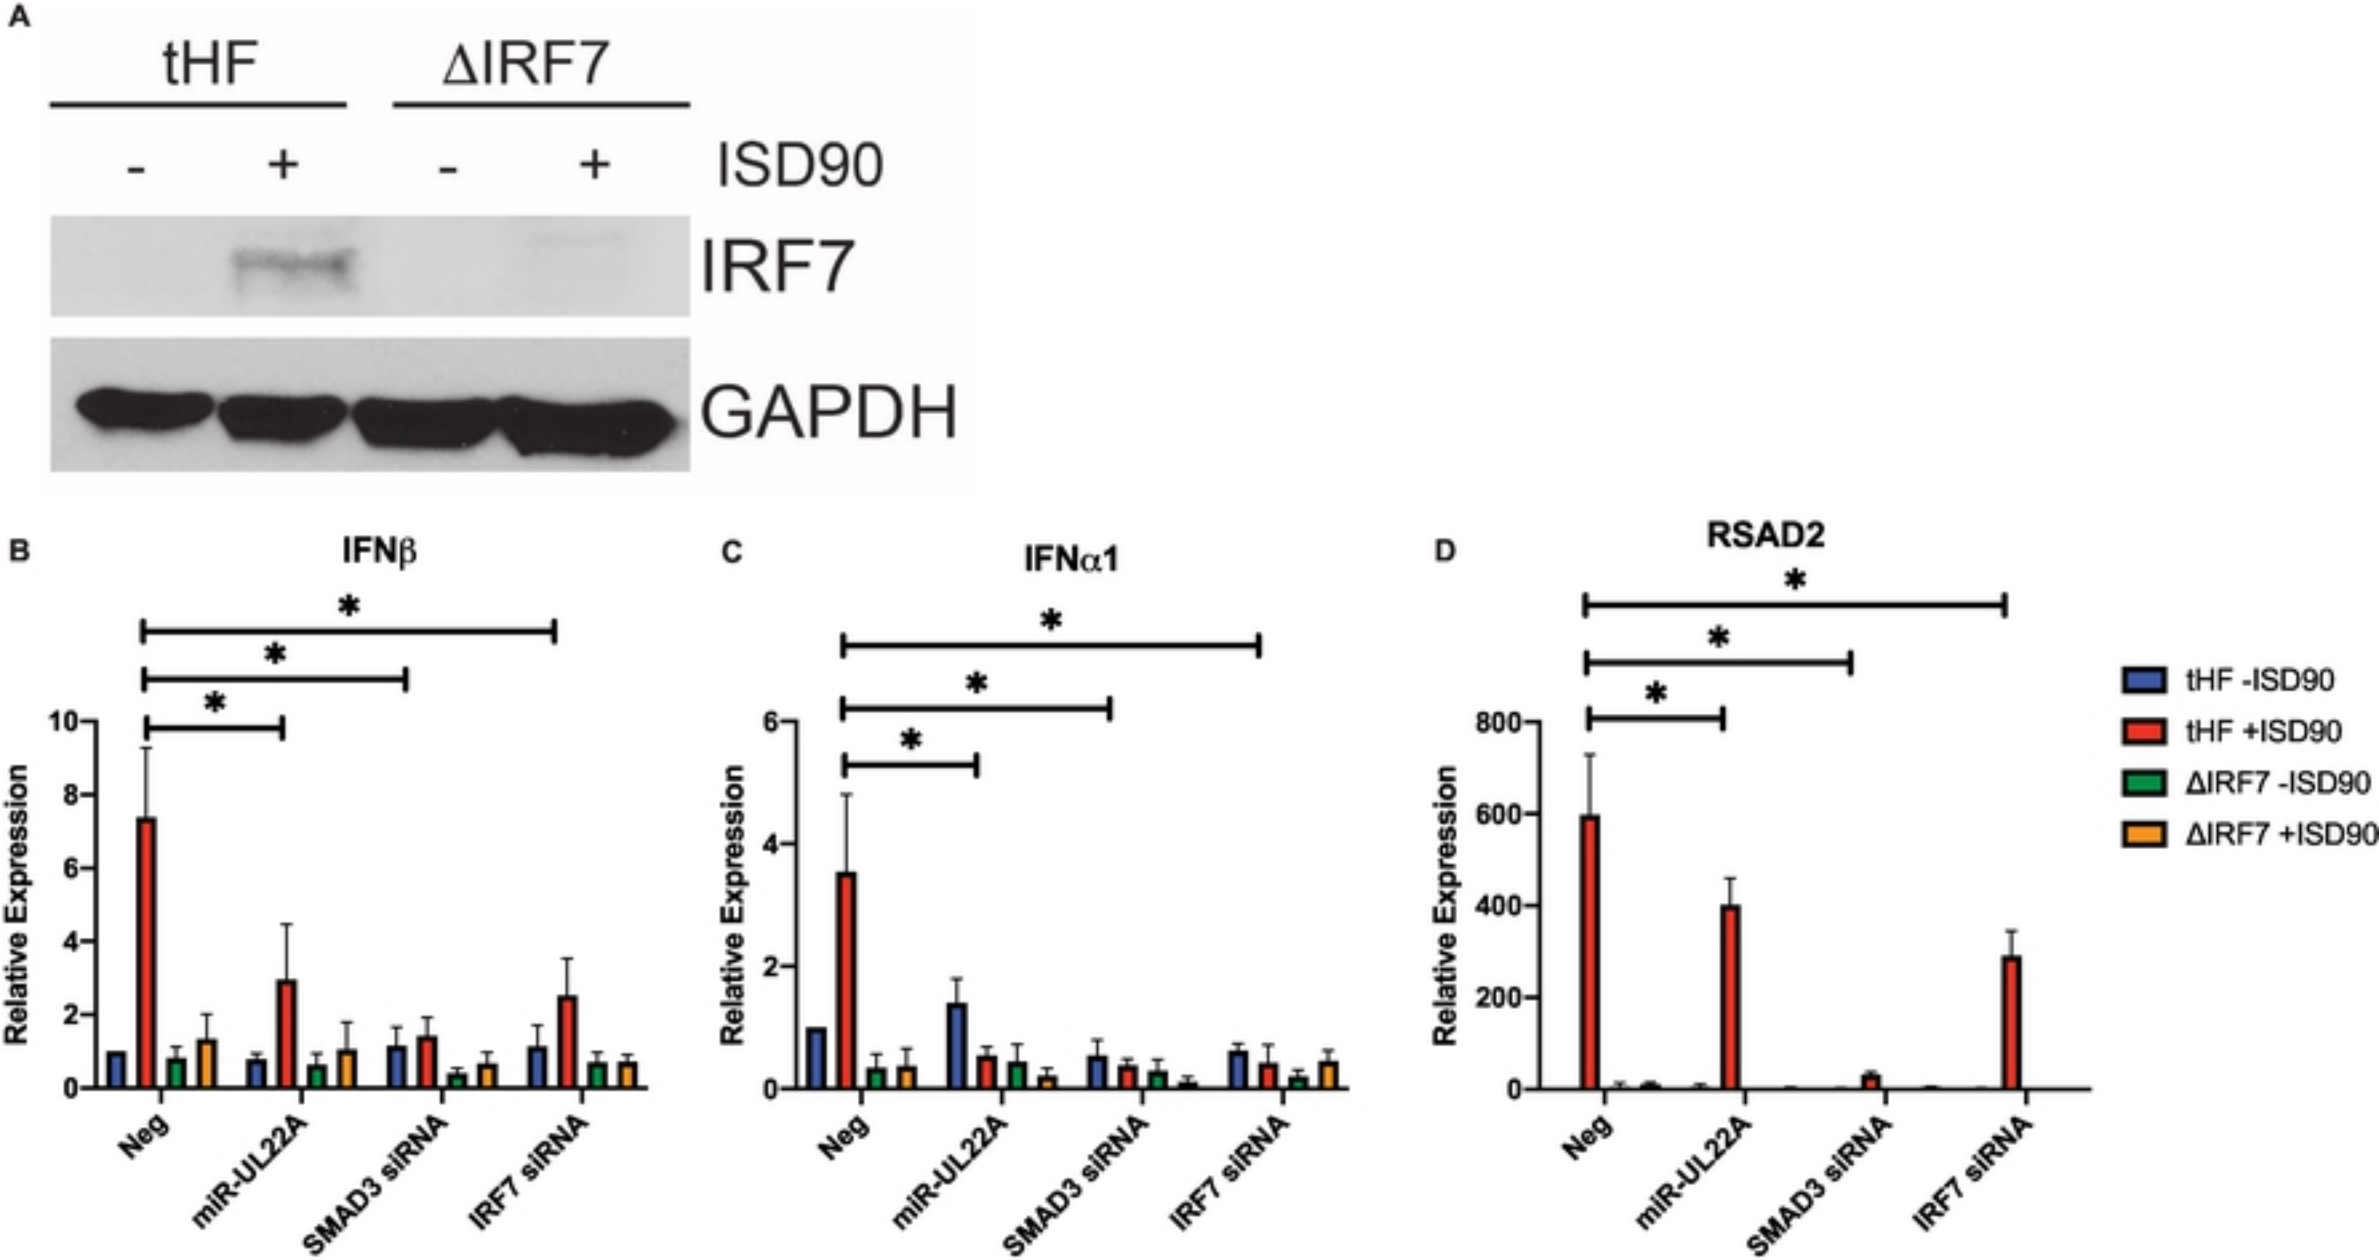

Figure 6

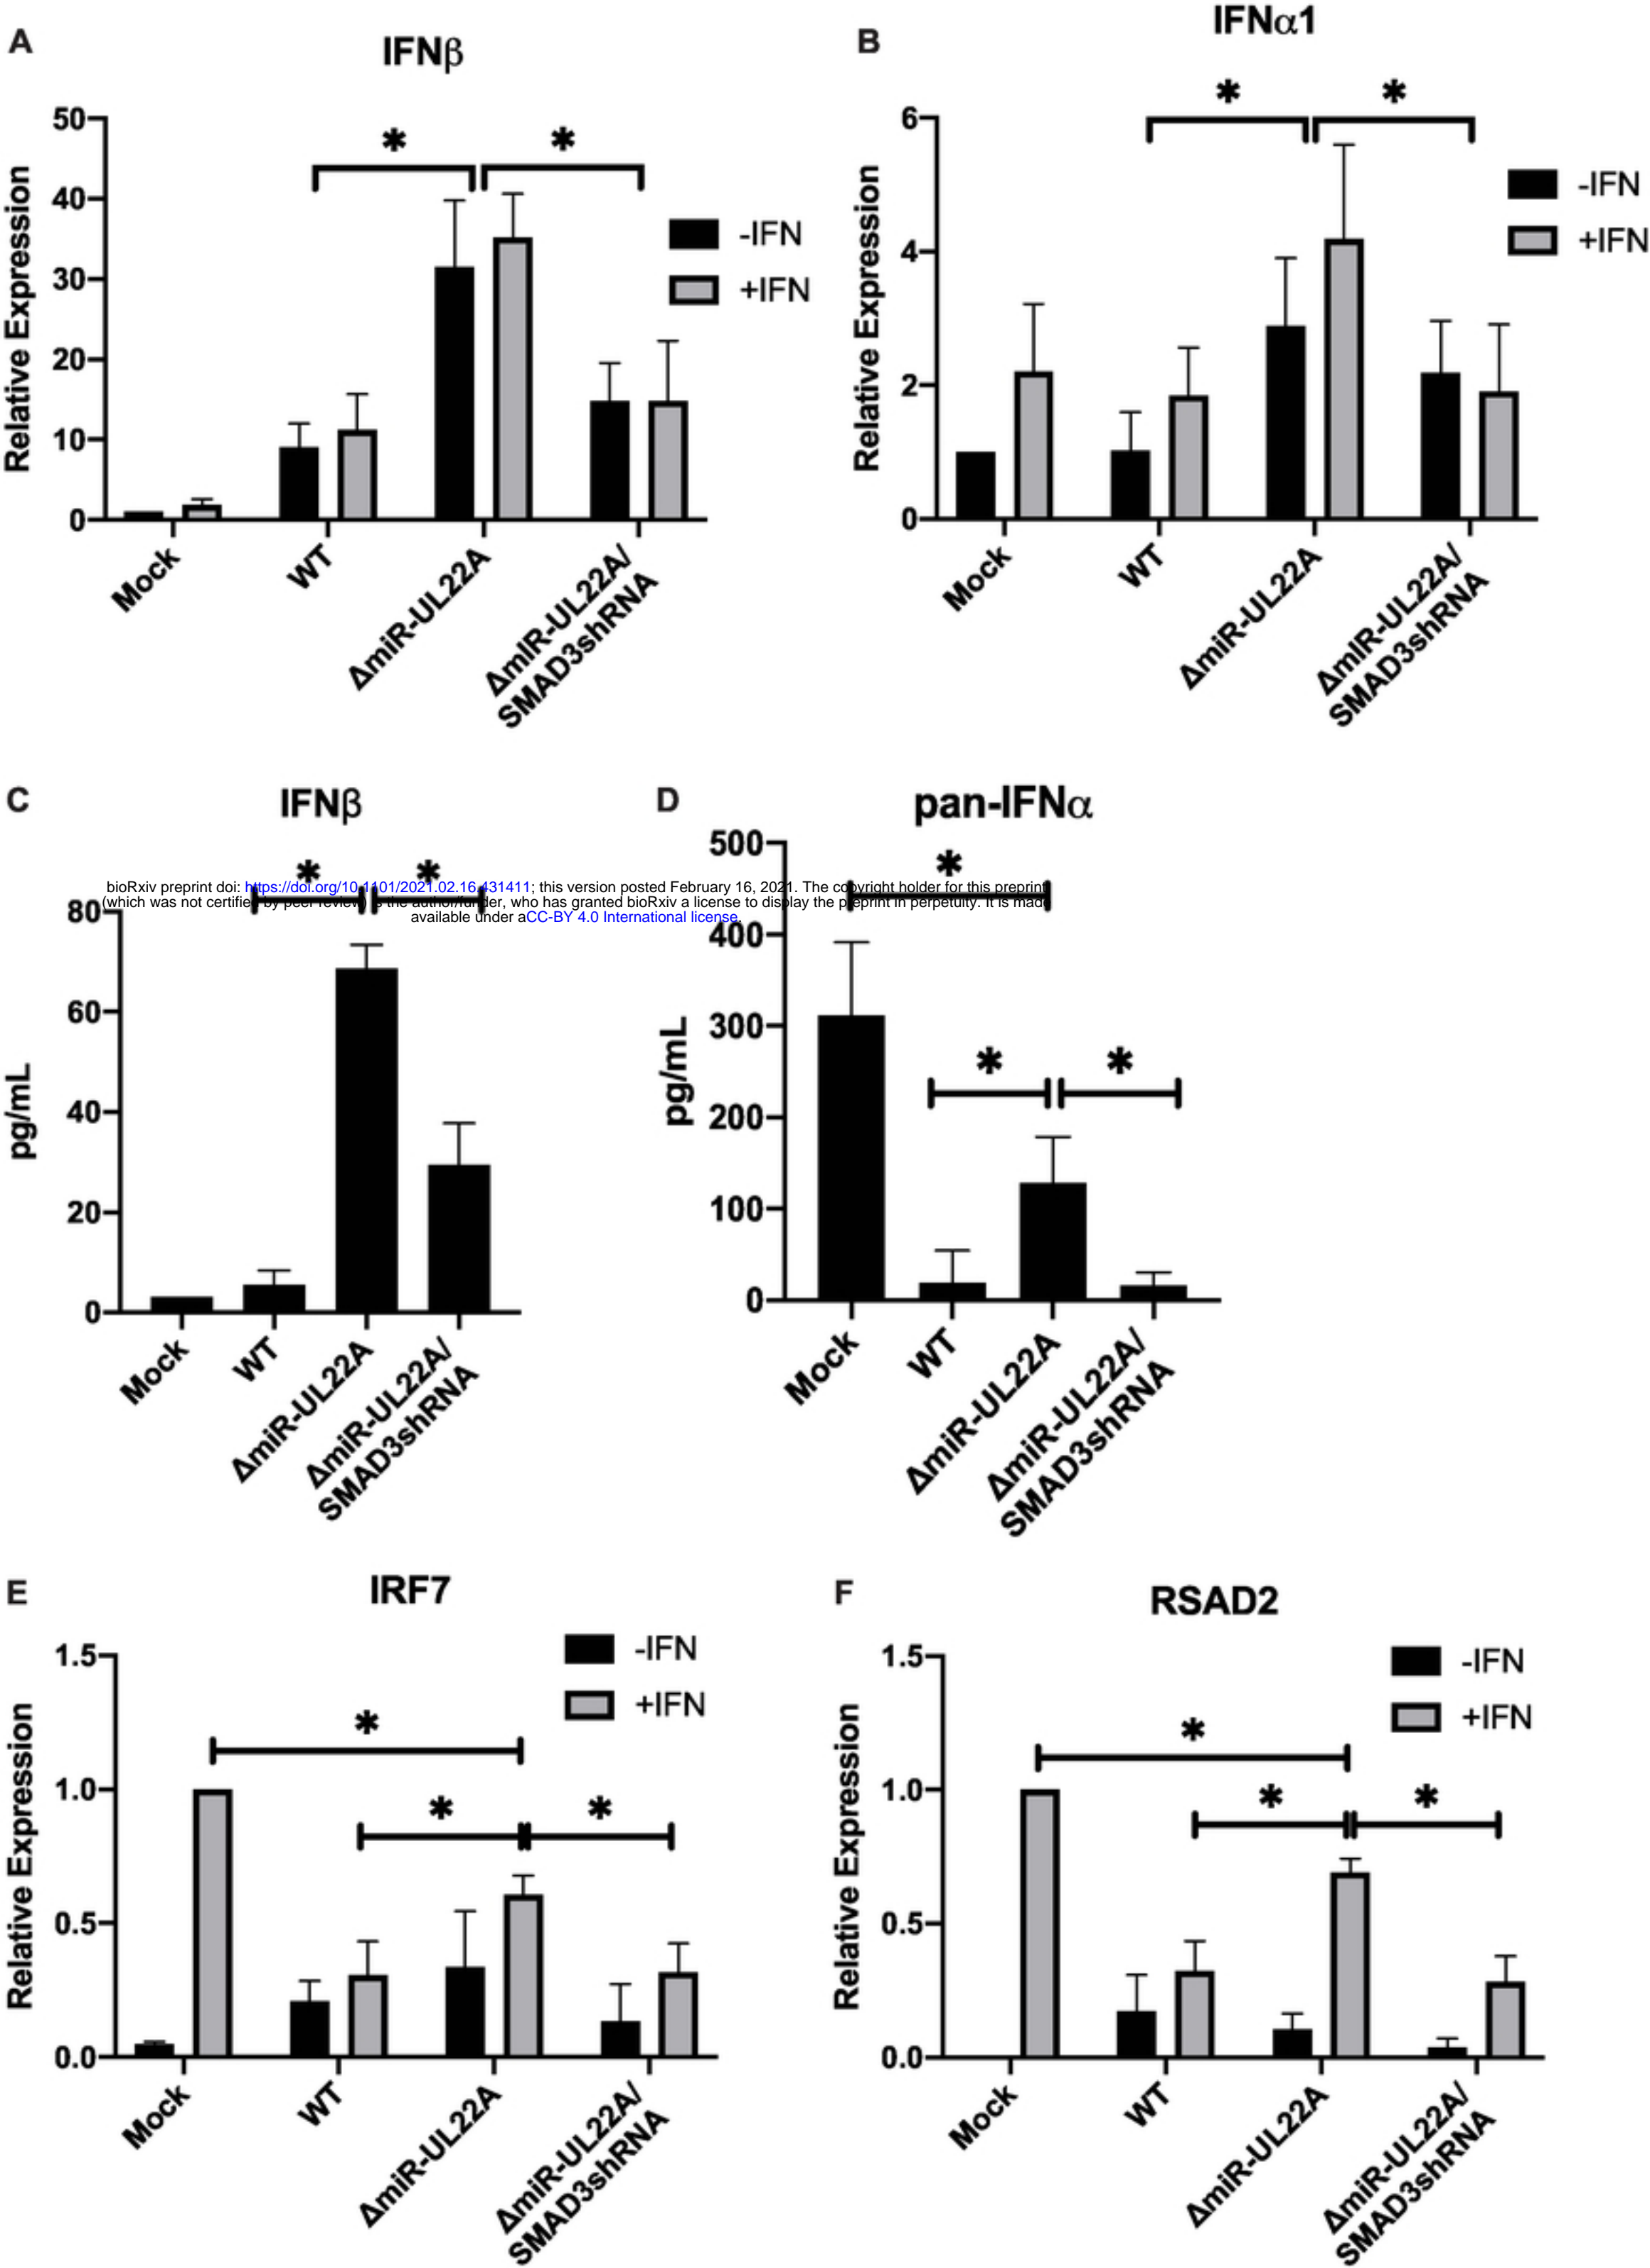

Figure 7

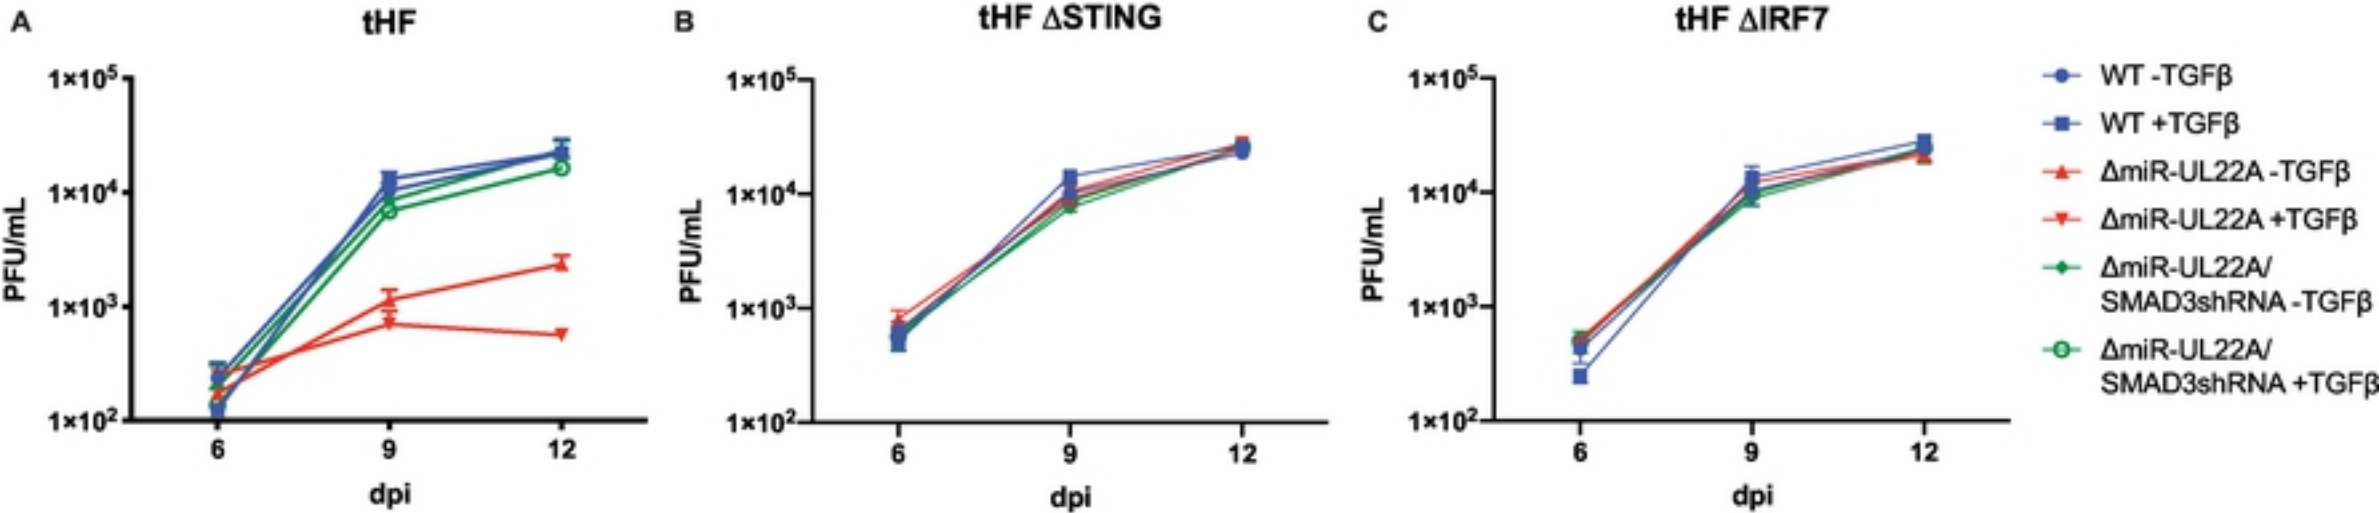

Figure 8
